# Supplementary material for: Estimated Number of Short-Stay Service Recipients in Hokkaido Prefecture, Japan, from 2020 to 2045: Estimation by Machine Learning and Review of Changing Trend by Cartogram
Source: Research Square preprint supplement (doi:10.21203/rs.3.rs-111572/v1), 2020-12-03
Supplement: Supplementary file 4 [file 3d7a9b6da775f0f184d1bb37.docx]

**Additional file 1**

**Estimated number of short-stay service recipients**

**in administration units of Hokkaido 2020-2045**

Appendix Table 1-1. Estimated number of short-stay service recipients

in administration units of Hokkaido in 2020

| **J-Code** | **Administration District** | **Total population** | **Level 1** | **Level 2** | **Level 3** | **Level 4** | **Level 5** |
| --- | --- | --- | --- | --- | --- | --- | --- |
| 1101 | Sapporo C., Chuo-ku | 250176 | 77 | 126 | 110 | 74 | 90 |
| 1102 | Sapporo C., Kita-ku | 289554 | 99 | 124 | 98 | 76 | 58 |
| 1103 | Sapporo C., Higashi-ku | 265450 | 74 | 99 | 86 | 65 | 59 |
| 1104 | Sapporo C., Shiroishi-ku | 212980 | 65 | 100 | 89 | 52 | 67 |
| 1105 | Sapporo C., Toyohira-ku | 223197 | 57 | 95 | 94 | 59 | 60 |
| 1106 | Sapporo C., Minami-ku | 136143 | 87 | 99 | 132 | 68 | 55 |
| 1107 | Sapporo C., Nishi-ku | 215258 | 112 | 155 | 105 | 64 | 98 |
| 1108 | Sapporo C., Atsubetsu-ku | 125949 | 48 | 91 | 57 | 58 | 57 |
| 1109 | Sapporo C., Teine-ku | 141486 | 75 | 91 | 74 | 70 | 41 |
| 1110 | Sapporo C., Kiyota-ku | 114608 | 49 | 80 | 50 | 42 | 51 |
| 1202 | Hakodate C. | 249794 | 97 | 151 | 127 | 100 | 101 |
| 1203 | Otaru C. | 111129 | 61 | 79 | 62 | 43 | 33 |
| 1204 | Asahikawa C. | 329655 | 183 | 212 | 238 | 164 | 125 |
| 1205 | Muroran C. | 81874 | 45 | 48 | 43 | 41 | 29 |
| 1206 | Kushiro C. | 166270 | 82 | 120 | 88 | 74 | 63 |
| 1207 | Obihiro C. | 169138 | 80 | 107 | 90 | 54 | 61 |
| 1208 | Kitami C. | 116312 | 70 | 84 | 114 | 60 | 59 |
| 1209 | Yubari C. | 7185 | 5 | 3 | 5 | 3 | 1 |
| 1210 | Iwamizawa C. | 78591 | 36 | 57 | 52 | 39 | 25 |
| 1211 | Abashiri C. | 37022 | 22 | 22 | 21 | 18 | 11 |
| 1212 | Rumoi C. | 19968 | 10 | 11 | 12 | 8 | 8 |
| 1213 | Tomakomai C. | 170448 | 87 | 105 | 75 | 59 | 41 |
| 1214 | Wakkanai C. | 33212 | 15 | 24 | 16 | 14 | 18 |
| 1215 | Bibai C. | 20254 | 10 | 12 | 16 | 10 | 6 |
| 1216 | Ashibetsu C. | 12761 | 8 | 5 | 7 | 5 | 3 |
| 1217 | Ebetsu C. | 116429 | 54 | 73 | 67 | 55 | 49 |
| 1218 | Akabira C. | 9555 | 7 | 5 | 8 | 5 | 5 |
| 1219 | Mombetsu C. | 21249 | 11 | 15 | 30 | 15 | 11 |
| 1220 | Shibetsu C. | 18121 | 11 | 13 | 16 | 7 | 5 |
| 1221 | Nayoro C. | 27361 | 19 | 20 | 25 | 13 | 11 |
| 1222 | Mikasa C. | 7743 | 6 | 6 | 6 | 3 | 2 |
| 1223 | Nemuro C. | 24461 | 12 | 18 | 23 | 12 | 14 |
| 1224 | Chitose C. | 96739 | 16 | 28 | 40 | 24 | 13 |
| 1225 | Takikawa C. | 38922 | 24 | 28 | 31 | 19 | 18 |
| 1226 | Sunagawa C. | 16210 | 11 | 9 | 10 | 7 | 5 |
| 1227 | Utashinai C. | 2884 | 2 | 2 | 2 | 1 | 1 |
| 1228 | Fukagawa C. | 20156 | 12 | 13 | 10 | 9 | 5 |
| 1229 | Furano C. | 21596 | 10 | 16 | 20 | 11 | 13 |
| 1230 | Noboribetsu C. | 47150 | 29 | 28 | 29 | 23 | 14 |
| 1231 | Eniwa C. | 69449 | 23 | 35 | 29 | 22 | 16 |
| 1233 | Date C. | 33520 | 15 | 17 | 18 | 11 | 10 |
| 1234 | Kitahiroshima C. | 57339 | 19 | 26 | 25 | 16 | 18 |
| 1235 | Ishikari C. | 55066 | 28 | 40 | 32 | 17 | 20 |
| 1236 | Hokuto C. | 43973 | 20 | 32 | 15 | 16 | 21 |
| 1303 | Tobetsu-cho | 15718 | 6 | 14 | 15 | 10 | 9 |
| 1304 | Shinshinotsu-mura | 3052 | 2 | 2 | 4 | 1 | 2 |
| 1331 | Matsumae-cho | 6109 | 3 | 3 | 3 | 2 | 1 |
| 1332 | Fukushima-cho | 3742 | 3 | 2 | 2 | 2 | 1 |
| 1333 | Shiriuchi-cho | 4219 | 2 | 2 | 3 | 2 | 1 |
| 1334 | Kikonai-cho | 3856 | 3 | 2 | 3 | 2 | 2 |
| 1337 | Nanae-cho | 27228 | 12 | 19 | 16 | 14 | 8 |
| 1343 | Shikabe-cho | 3914 | 2 | 2 | 3 | 2 | 1 |
| 1345 | Mori-machi | 14138 | 7 | 6 | 7 | 4 | 4 |
| 1346 | Yakumo-cho | 15600 | 8 | 11 | 13 | 8 | 6 |
| 1347 | Oshamambe-cho | 5182 | 3 | 3 | 5 | 3 | 2 |
| 1361 | Esashi-cho | 7392 | 4 | 5 | 5 | 4 | 3 |
| 1362 | Kaminokuni-cho | 4239 | 3 | 2 | 4 | 2 | 2 |
| 1363 | Assabu-cho | 3618 | 3 | 3 | 3 | 2 | 2 |
| 1364 | Otobe-cho | 3414 | 2 | 2 | 2 | 1 | 1 |
| 1367 | Okushiri-cho | 2305 | 2 | 1 | 2 | 1 | 0 |
| 1370 | Imakane-cho | 5082 | 4 | 3 | 4 | 3 | 2 |
| 1371 | Setana-cho | 7435 | 5 | 3 | 5 | 2 | 1 |
| 1391 | Shimamaki-mura | 1309 | 0 | 1 | 1 | 1 | 0 |
| 1392 | Suttsu-cho | 2766 | 2 | 2 | 2 | 1 | 0 |
| 1393 | Kuromatsunai-cho | 2805 | 2 | 2 | 3 | 1 | 1 |
| 1394 | Rankoshi-cho | 4352 | 2 | 3 | 5 | 2 | 2 |
| 1395 | Niseko-cho | 4948 | 3 | 4 | 3 | 2 | 3 |
| 1396 | Makkari-mura | 1923 | 2 | 1 | 3 | 1 | 1 |
| 1397 | Rusutsu-mura | 1757 | 1 | 2 | 2 | 1 | 2 |
| 1398 | Kimobetsu-cho | 2053 | 1 | 1 | 2 | 1 | 1 |
| 1399 | Kyogoku-cho | 2857 | 2 | 2 | 3 | 2 | 2 |
| 1400 | Kutchan-cho | 14277 | 4 | 6 | 5 | 4 | 5 |
| 1401 | Kyowa-cho | 5736 | 2 | 4 | 4 | 3 | 3 |
| 1402 | Iwanai-cho | 11604 | 5 | 8 | 6 | 6 | 6 |
| 1403 | Tomari-mura | 1640 | 1 | 1 | 1 | 1 | 1 |
| 1404 | Kamoenai-mura | 877 | 1 | 0 | 1 | 0 | 0 |
| 1405 | Shakotan-cho | 1785 | 1 | 1 | 2 | 1 | 1 |
| 1406 | Furubira-cho | 2755 | 1 | 2 | 2 | 1 | 1 |
| 1407 | Niki-cho | 3252 | 2 | 2 | 2 | 1 | 1 |
| 1408 | Yoichi-cho | 17851 | 9 | 8 | 9 | 5 | 4 |
| 1409 | Akaigawa-mura | 1003 | 0 | 1 | 0 | 0 | 0 |
| 1423 | Nanporo-cho | 7176 | 3 | 5 | 10 | 4 | 4 |
| 1424 | Naie-cho | 5154 | 3 | 2 | 3 | 3 | 1 |
| 1425 | Kamisunagawa-cho | 2947 | 2 | 2 | 2 | 1 | 0 |
| 1427 | Yuni-cho | 4767 | 3 | 3 | 7 | 2 | 2 |
| 1428 | Naganuma-cho | 10401 | 7 | 8 | 12 | 7 | 5 |
| 1429 | Kuriyama-cho | 11424 | 8 | 7 | 7 | 6 | 3 |
| 1430 | Tsukigata-cho | 4290 | 2 | 4 | 2 | 3 | 4 |
| 1431 | Urausu-cho | 1786 | 1 | 1 | 1 | 1 | 1 |
| 1432 | Shintotsukawa-cho | 6354 | 3 | 4 | 6 | 3 | 2 |
| 1433 | Moseushi-cho | 2708 | 2 | 1 | 2 | 1 | 1 |
| 1434 | Chippubetsu-cho | 2227 | 1 | 1 | 1 | 1 | 1 |
| 1436 | Uryu-cho | 2439 | 2 | 1 | 2 | 1 | 1 |
| 1437 | Hokuryu-cho | 1777 | 1 | 1 | 1 | 1 | 0 |
| 1438 | Numata-cho | 2781 | 2 | 2 | 3 | 1 | 1 |
| 1452 | Takasu-cho | 6758 | 3 | 5 | 4 | 3 | 4 |
| 1453 | Higashikagura-cho | 10390 | 2 | 8 | 6 | 4 | 4 |
| 1454 | Tohma-cho | 6224 | 4 | 5 | 4 | 3 | 2 |
| 1455 | Pippu-cho | 3429 | 2 | 2 | 3 | 2 | 1 |
| 1456 | Aibetsu-cho | 2631 | 1 | 1 | 1 | 1 | 0 |
| 1457 | Kamikawa-cho | 3521 | 2 | 2 | 3 | 2 | 1 |
| 1458 | Higashikawa-cho | 7988 | 2 | 3 | 4 | 5 | 4 |
| 1459 | Biei-cho | 9580 | 6 | 7 | 9 | 4 | 4 |
| 1460 | Kamifurano-cho | 9991 | 6 | 6 | 7 | 5 | 5 |
| 1461 | Nakafurano-cho | 4664 | 3 | 3 | 7 | 4 | 3 |
| 1462 | Minamifurano-cho | 2331 | 0 | 1 | 1 | 1 | 1 |
| 1463 | Shimukappu-mura | 1005 | 1 | 1 | 1 | 1 | 1 |
| 1464 | Wassamu-cho | 3184 | 1 | 1 | 2 | 1 | 1 |
| 1465 | Kembuchi-cho | 2940 | 2 | 2 | 3 | 1 | 1 |
| 1468 | Shimokawa-cho | 3161 | 2 | 2 | 3 | 2 | 1 |
| 1469 | Bifuka-cho | 4132 | 3 | 2 | 2 | 2 | 1 |
| 1470 | Otoineppu-mura | 681 | 0 | 0 | 1 | 0 | 0 |
| 1471 | Nakagawa-cho | 1567 | 1 | 1 | 2 | 1 | 1 |
| 1472 | Horokanai-cho | 1316 | 1 | 1 | 1 | 0 | 0 |
| 1481 | Mashike-cho | 3933 | 3 | 2 | 3 | 2 | 2 |
| 1482 | Obira-cho | 2959 | 1 | 2 | 1 | 1 | 1 |
| 1483 | Tomamae-cho | 2814 | 1 | 2 | 2 | 1 | 1 |
| 1484 | Haboro-cho | 6648 | 4 | 5 | 3 | 2 | 2 |
| 1485 | Shosambetsu-mura | 1052 | 0 | 1 | 1 | 1 | 1 |
| 1486 | Embetsu-cho | 2507 | 2 | 2 | 2 | 1 | 1 |
| 1487 | Teshio-cho | 2893 | 2 | 2 | 4 | 1 | 1 |
| 1511 | Sarufutsu-mura | 2524 | 1 | 1 | 2 | 1 | 1 |
| 1512 | Hamatombetsu-cho | 3501 | 3 | 3 | 5 | 2 | 1 |
| 1513 | Nakatombetsu-cho | 1548 | 0 | 1 | 1 | 1 | 1 |
| 1514 | Esashi-cho | 7691 | 5 | 6 | 8 | 4 | 5 |
| 1516 | Toyotomi-cho | 3683 | 3 | 2 | 3 | 2 | 1 |
| 1517 | Rebun-cho | 2413 | 1 | 2 | 1 | 1 | 1 |
| 1518 | Rishiri-cho | 1945 | 1 | 1 | 1 | 1 | 1 |
| 1519 | Rishirifuji-cho | 2420 | 2 | 2 | 3 | 1 | 1 |
| 1520 | Horonobe-cho | 2259 | 1 | 1 | 1 | 1 | 1 |
| 1543 | Bihoro-cho | 18988 | 13 | 14 | 27 | 13 | 11 |
| 1544 | Tsubetsu-cho | 4433 | 4 | 2 | 3 | 2 | 1 |
| 1545 | Shari-cho | 11474 | 8 | 7 | 7 | 6 | 4 |
| 1546 | Kiyosato-cho | 3889 | 3 | 3 | 3 | 2 | 1 |
| 1547 | Koshimizu-cho | 4771 | 4 | 3 | 4 | 3 | 3 |
| 1549 | Kunneppu-cho | 4712 | 4 | 3 | 4 | 2 | 2 |
| 1550 | Oketo-cho | 2768 | 2 | 2 | 2 | 1 | 0 |
| 1552 | Saroma-cho | 4837 | 3 | 3 | 2 | 2 | 1 |
| 1555 | Engaru-cho | 19412 | 13 | 14 | 12 | 7 | 6 |
| 1559 | Yubetsu-cho | 8422 | 5 | 6 | 8 | 4 | 3 |
| 1560 | Takinoue-cho | 2401 | 2 | 2 | 2 | 1 | 1 |
| 1561 | Okoppe-cho | 3543 | 2 | 2 | 3 | 2 | 1 |
| 1562 | Nishiokoppe-mura | 1043 | 1 | 1 | 2 | 1 | 1 |
| 1563 | Omu-cho | 4067 | 2 | 4 | 2 | 2 | 2 |
| 1564 | Ozora-cho | 6810 | 4 | 5 | 8 | 4 | 3 |
| 1571 | Toyoura-cho | 3978 | 3 | 3 | 3 | 1 | 1 |
| 1575 | Sobetsu-cho | 2685 | 2 | 2 | 2 | 1 | 0 |
| 1578 | Shiraoi-cho | 15976 | 7 | 9 | 7 | 6 | 4 |
| 1581 | Atsuma-cho | 4685 | 3 | 3 | 4 | 2 | 1 |
| 1584 | Toyako-cho | 8355 | 4 | 3 | 5 | 3 | 2 |
| 1585 | Abira-cho | 7519 | 2 | 3 | 4 | 3 | 3 |
| 1586 | Mukawa-cho | 7582 | 6 | 5 | 5 | 4 | 3 |
| 1601 | Hidaka-cho | 11257 | 7 | 8 | 14 | 6 | 5 |
| 1602 | Biratori-cho | 4850 | 2 | 4 | 3 | 2 | 3 |
| 1604 | Niikappu-cho | 5293 | 2 | 3 | 5 | 3 | 3 |
| 1607 | Urakawa-cho | 11719 | 5 | 11 | 6 | 6 | 7 |
| 1608 | Samani-cho | 3995 | 2 | 2 | 3 | 2 | 2 |
| 1609 | Erimo-cho | 4443 | 1 | 2 | 2 | 1 | 1 |
| 1610 | Shinhidaka-cho | 21069 | 15 | 15 | 22 | 10 | 10 |
| 1631 | Otofuke-cho | 44326 | 25 | 32 | 32 | 18 | 26 |
| 1632 | Shihoro-cho | 5824 | 3 | 2 | 3 | 2 | 1 |
| 1633 | Kamishihoro-cho | 4406 | 3 | 3 | 2 | 2 | 1 |
| 1634 | Shikaoi-cho | 5355 | 4 | 3 | 4 | 2 | 3 |
| 1635 | Shintoku-cho | 5808 | 4 | 4 | 5 | 2 | 2 |
| 1636 | Shimizu-cho | 9162 | 6 | 6 | 5 | 4 | 2 |
| 1637 | Memuro-cho | 17900 | 10 | 13 | 14 | 8 | 11 |
| 1638 | Nakasatsunai-mura | 3825 | 2 | 3 | 3 | 2 | 2 |
| 1639 | Sarabetsu-mura | 3070 | 2 | 2 | 4 | 3 | 2 |
| 1641 | Taiki-cho | 5449 | 4 | 4 | 4 | 2 | 2 |
| 1642 | Hiroo-cho | 6374 | 3 | 4 | 5 | 3 | 2 |
| 1643 | Makubetsu-cho | 26350 | 15 | 19 | 21 | 13 | 12 |
| 1644 | Ikeda-cho | 6223 | 4 | 2 | 7 | 3 | 3 |
| 1645 | Toyokoro-cho | 2866 | 2 | 1 | 2 | 1 | 1 |
| 1646 | Hombetsu-cho | 6570 | 4 | 2 | 3 | 3 | 2 |
| 1647 | Ashoro-cho | 6354 | 5 | 5 | 4 | 3 | 2 |
| 1648 | Rikubetsu-cho | 2246 | 1 | 2 | 1 | 1 | 1 |
| 1649 | Urahoro-cho | 4375 | 3 | 3 | 4 | 2 | 3 |
| 1661 | Kushiro-cho | 18824 | 6 | 7 | 8 | 6 | 5 |
| 1662 | Akkeshi-cho | 8957 | 5 | 7 | 11 | 5 | 4 |
| 1663 | Hamanaka-cho | 5570 | 3 | 2 | 3 | 3 | 2 |
| 1664 | Shibecha-cho | 7172 | 4 | 4 | 6 | 3 | 2 |
| 1665 | Teshikaga-cho | 7117 | 3 | 5 | 7 | 4 | 3 |
| 1667 | Tsurui-mura | 2421 | 1 | 1 | 1 | 1 | 0 |
| 1668 | Shiranuka-cho | 6909 | 2 | 5 | 9 | 3 | 4 |
| 1691 | Betsukai-cho | 14554 | 6 | 9 | 7 | 7 | 3 |
| 1692 | Nakashibetsu-cho | 23311 | 8 | 11 | 10 | 8 | 6 |
| 1693 | Shibetsu-cho | 4853 | 2 | 4 | 2 | 2 | 2 |
| 1694 | Rausu-cho | 4824 | 1 | 3 | 2 | 2 | 2 |

Appendix Table 1-2. Estimated number of short-stay service recipients

in administration units of Hokkaido in 2025

| **J-Code** | **Administration District** | **Total**  **Population** | **Level 1** | **Level 2** | **Level 3** | **Level 4** | **Level 5** |
| --- | --- | --- | --- | --- | --- | --- | --- |
| 1101 | Sapporo C., Chuo-ku | 259039 | 101 | 188 | 250 | 93 | 201 |
| 1102 | Sapporo C., Kita-ku | 290737 | 136 | 211 | 152 | 143 | 146 |
| 1103 | Sapporo C., Higashi-ku | 266542 | 119 | 182 | 143 | 106 | 183 |
| 1104 | Sapporo C., Shiroishi-ku | 214350 | 88 | 156 | 146 | 80 | 143 |
| 1105 | Sapporo C., Toyohira-ku | 225491 | 108 | 164 | 237 | 125 | 291 |
| 1106 | Sapporo C., Minami-ku | 130103 | 67 | 49 | 103 | 56 | 43 |
| 1107 | Sapporo C., Nishi-ku | 214889 | 88 | 176 | 270 | 171 | 173 |
| 1108 | Sapporo C., Atsubetsu-ku | 122720 | 59 | 95 | 180 | 107 | 70 |
| 1109 | Sapporo C., Teine-ku | 140345 | 66 | 62 | 73 | 42 | 57 |
| 1110 | Sapporo C., Kiyota-ku | 112151 | 54 | 93 | 97 | 50 | 59 |
| 1202 | Hakodate C. | 232653 | 135 | 180 | 302 | 203 | 162 |
| 1203 | Otaru C. | 100236 | 57 | 73 | 139 | 86 | 70 |
| 1204 | Asahikawa C. | 316837 | 196 | 230 | 271 | 150 | 165 |
| 1205 | Muroran C. | 74810 | 38 | 45 | 69 | 30 | 34 |
| 1206 | Kushiro C. | 156671 | 95 | 122 | 158 | 90 | 95 |
| 1207 | Obihiro C. | 167296 | 87 | 111 | 110 | 75 | 71 |
| 1208 | Kitami C. | 110446 | 60 | 85 | 95 | 47 | 57 |
| 1209 | Yubari C. | 5778 | 4 | 4 | 7 | 3 | 3 |
| 1210 | Iwamizawa C. | 72377 | 34 | 40 | 79 | 38 | 24 |
| 1211 | Abashiri C. | 34829 | 20 | 18 | 22 | 11 | 14 |
| 1212 | Rumoi C. | 17749 | 11 | 13 | 22 | 15 | 12 |
| 1213 | Tomakomai C. | 166550 | 72 | 121 | 93 | 74 | 80 |
| 1214 | Wakkanai C. | 29983 | 16 | 24 | 38 | 24 | 21 |
| 1215 | Bibai C. | 17618 | 9 | 13 | 26 | 11 | 9 |
| 1216 | Ashibetsu C. | 10974 | 5 | 4 | 14 | 4 | 3 |
| 1217 | Ebetsu C. | 111519 | 55 | 78 | 143 | 78 | 48 |
| 1218 | Akabira C. | 8114 | 4 | 3 | 9 | 3 | 2 |
| 1219 | Mombetsu C. | 19356 | 9 | 13 | 25 | 12 | 7 |
| 1220 | Shibetsu C. | 16344 | 9 | 10 | 16 | 7 | 7 |
| 1221 | Nayoro C. | 25552 | 14 | 14 | 16 | 8 | 12 |
| 1222 | Mikasa C. | 6551 | 3 | 4 | 6 | 3 | 3 |
| 1223 | Nemuro C. | 22005 | 11 | 16 | 31 | 20 | 14 |
| 1224 | Chitose C. | 96786 | 44 | 39 | 40 | 23 | 24 |
| 1225 | Takikawa C. | 36394 | 20 | 27 | 39 | 27 | 22 |
| 1226 | Sunagawa C. | 14687 | 7 | 7 | 13 | 7 | 5 |
| 1227 | Utashinai C. | 2298 | 1 | 1 | 1 | 1 | 1 |
| 1228 | Fukagawa C. | 18343 | 12 | 13 | 18 | 9 | 9 |
| 1229 | Furano C. | 20161 | 11 | 15 | 28 | 18 | 14 |
| 1230 | Noboribetsu C. | 44290 | 28 | 32 | 36 | 27 | 24 |
| 1231 | Eniwa C. | 68548 | 35 | 49 | 47 | 38 | 41 |
| 1233 | Date C. | 31782 | 20 | 20 | 22 | 16 | 14 |
| 1234 | Kitahiroshima C. | 54990 | 33 | 44 | 66 | 42 | 38 |
| 1235 | Ishikari C. | 52139 | 22 | 38 | 28 | 24 | 25 |
| 1236 | Hokuto C. | 41272 | 19 | 36 | 46 | 30 | 29 |
| 1303 | Tobetsu-cho | 14194 | 6 | 10 | 19 | 5 | 8 |
| 1304 | Shinshinotsu-mura | 2798 | 1 | 1 | 2 | 1 | 1 |
| 1331 | Matsumae-cho | 5038 | 3 | 4 | 6 | 3 | 2 |
| 1332 | Fukushima-cho | 3131 | 2 | 2 | 2 | 2 | 1 |
| 1333 | Shiriuchi-cho | 3787 | 2 | 3 | 3 | 2 | 1 |
| 1334 | Kikonai-cho | 3242 | 1 | 1 | 2 | 1 | 1 |
| 1337 | Nanae-cho | 26055 | 15 | 18 | 20 | 10 | 11 |
| 1343 | Shikabe-cho | 3609 | 3 | 3 | 3 | 2 | 1 |
| 1345 | Mori-machi | 12425 | 7 | 9 | 18 | 10 | 9 |
| 1346 | Yakumo-cho | 13995 | 7 | 11 | 12 | 5 | 6 |
| 1347 | Oshamambe-cho | 4566 | 2 | 2 | 3 | 2 | 1 |
| 1361 | Esashi-cho | 6564 | 4 | 5 | 6 | 3 | 3 |
| 1362 | Kaminokuni-cho | 3628 | 2 | 3 | 3 | 2 | 1 |
| 1363 | Assabu-cho | 3204 | 1 | 2 | 3 | 1 | 1 |
| 1364 | Otobe-cho | 2944 | 2 | 2 | 4 | 1 | 2 |
| 1367 | Okushiri-cho | 1974 | 1 | 1 | 1 | 1 | 0 |
| 1370 | Imakane-cho | 4628 | 1 | 2 | 3 | 1 | 2 |
| 1371 | Setana-cho | 6461 | 3 | 2 | 4 | 2 | 2 |
| 1391 | Shimamaki-mura | 1139 | 1 | 1 | 2 | 1 | 1 |
| 1392 | Suttsu-cho | 2442 | 1 | 1 | 2 | 1 | 1 |
| 1393 | Kuromatsunai-cho | 2563 | 1 | 1 | 2 | 1 | 1 |
| 1394 | Rankoshi-cho | 3896 | 2 | 3 | 6 | 2 | 2 |
| 1395 | Niseko-cho | 4957 | 1 | 4 | 5 | 3 | 4 |
| 1396 | Makkari-mura | 1763 | 0 | 1 | 1 | 1 | 0 |
| 1397 | Rusutsu-mura | 1619 | 0 | 1 | 1 | 1 | 1 |
| 1398 | Kimobetsu-cho | 1834 | 1 | 1 | 2 | 2 | 1 |
| 1399 | Kyogoku-cho | 2535 | 2 | 2 | 2 | 2 | 3 |
| 1400 | Kutchan-cho | 13482 | 5 | 10 | 7 | 5 | 11 |
| 1401 | Kyowa-cho | 5263 | 3 | 4 | 8 | 5 | 3 |
| 1402 | Iwanai-cho | 10249 | 5 | 8 | 15 | 8 | 6 |
| 1403 | Tomari-mura | 1519 | 0 | 1 | 1 | 1 | 1 |
| 1404 | Kamoenai-mura | 758 | 0 | 1 | 1 | 0 | 0 |
| 1405 | Shakotan-cho | 1498 | 1 | 1 | 2 | 1 | 1 |
| 1406 | Furubira-cho | 2352 | 1 | 2 | 3 | 2 | 1 |
| 1407 | Niki-cho | 3016 | 2 | 2 | 3 | 1 | 1 |
| 1408 | Yoichi-cho | 16108 | 9 | 8 | 16 | 8 | 7 |
| 1409 | Akaigawa-mura | 888 | 1 | 1 | 1 | 1 | 1 |
| 1423 | Nanporo-cho | 6489 | 5 | 5 | 6 | 3 | 2 |
| 1424 | Naie-cho | 4654 | 2 | 2 | 4 | 2 | 2 |
| 1425 | Kamisunagawa-cho | 2469 | 1 | 1 | 1 | 1 | 1 |
| 1427 | Yuni-cho | 4240 | 2 | 4 | 5 | 3 | 2 |
| 1428 | Naganuma-cho | 9687 | 3 | 4 | 9 | 3 | 3 |
| 1429 | Kuriyama-cho | 10465 | 6 | 8 | 8 | 6 | 5 |
| 1430 | Tsukigata-cho | 3966 | 1 | 4 | 4 | 3 | 3 |
| 1431 | Urausu-cho | 1590 | 0 | 1 | 1 | 0 | 1 |
| 1432 | Shintotsukawa-cho | 5842 | 3 | 4 | 8 | 4 | 4 |
| 1433 | Moseushi-cho | 2348 | 2 | 2 | 3 | 1 | 1 |
| 1434 | Chippubetsu-cho | 1972 | 1 | 1 | 2 | 1 | 1 |
| 1436 | Uryu-cho | 2153 | 1 | 1 | 2 | 1 | 1 |
| 1437 | Hokuryu-cho | 1579 | 1 | 1 | 1 | 1 | 1 |
| 1438 | Numata-cho | 2409 | 1 | 2 | 4 | 1 | 1 |
| 1452 | Takasu-cho | 6393 | 2 | 5 | 3 | 3 | 4 |
| 1453 | Higashikagura-cho | 10399 | 5 | 8 | 12 | 10 | 9 |
| 1454 | Tohma-cho | 5730 | 3 | 4 | 4 | 3 | 2 |
| 1455 | Pippu-cho | 3078 | 1 | 1 | 3 | 1 | 1 |
| 1456 | Aibetsu-cho | 2311 | 1 | 2 | 2 | 1 | 1 |
| 1457 | Kamikawa-cho | 3008 | 2 | 2 | 3 | 1 | 1 |
| 1458 | Higashikawa-cho | 7805 | 3 | 6 | 4 | 4 | 4 |
| 1459 | Biei-cho | 8844 | 5 | 6 | 10 | 7 | 6 |
| 1460 | Kamifurano-cho | 9160 | 5 | 7 | 7 | 5 | 5 |
| 1461 | Nakafurano-cho | 4251 | 2 | 4 | 3 | 2 | 1 |
| 1462 | Minamifurano-cho | 2126 | 1 | 2 | 1 | 1 | 3 |
| 1463 | Shimukappu-mura | 852 | 0 | 1 | 1 | 0 | 1 |
| 1464 | Wassamu-cho | 2816 | 2 | 2 | 3 | 1 | 1 |
| 1465 | Kembuchi-cho | 2613 | 1 | 2 | 2 | 1 | 1 |
| 1468 | Shimokawa-cho | 2791 | 1 | 2 | 2 | 1 | 2 |
| 1469 | Bifuka-cho | 3672 | 2 | 2 | 2 | 1 | 1 |
| 1470 | Otoineppu-mura | 571 | 0 | 0 | 0 | 0 | 0 |
| 1471 | Nakagawa-cho | 1372 | 0 | 1 | 1 | 1 | 1 |
| 1472 | Horokanai-cho | 1127 | 1 | 1 | 1 | 0 | 1 |
| 1481 | Mashike-cho | 3431 | 1 | 1 | 3 | 1 | 1 |
| 1482 | Obira-cho | 2602 | 1 | 2 | 4 | 1 | 2 |
| 1483 | Tomamae-cho | 2413 | 1 | 2 | 4 | 2 | 2 |
| 1484 | Haboro-cho | 5975 | 3 | 3 | 5 | 3 | 2 |
| 1485 | Shosambetsu-mura | 900 | 0 | 1 | 1 | 0 | 1 |
| 1486 | Embetsu-cho | 2234 | 1 | 1 | 2 | 1 | 1 |
| 1487 | Teshio-cho | 2553 | 2 | 2 | 2 | 1 | 1 |
| 1511 | Sarufutsu-mura | 2352 | 1 | 1 | 2 | 1 | 1 |
| 1512 | Hamatombetsu-cho | 3137 | 0 | 1 | 1 | 1 | 1 |
| 1513 | Nakatombetsu-cho | 1338 | 1 | 1 | 1 | 1 | 1 |
| 1514 | Esashi-cho | 6971 | 1 | 3 | 3 | 2 | 3 |
| 1516 | Toyotomi-cho | 3324 | 2 | 2 | 2 | 2 | 1 |
| 1517 | Rebun-cho | 2089 | 1 | 2 | 3 | 1 | 1 |
| 1518 | Rishiri-cho | 1645 | 1 | 1 | 2 | 1 | 1 |
| 1519 | Rishirifuji-cho | 2088 | 1 | 1 | 1 | 1 | 1 |
| 1520 | Horonobe-cho | 2058 | 1 | 1 | 2 | 1 | 1 |
| 1543 | Bihoro-cho | 17589 | 9 | 11 | 18 | 11 | 6 |
| 1544 | Tsubetsu-cho | 3907 | 2 | 2 | 3 | 1 | 1 |
| 1545 | Shari-cho | 10660 | 5 | 5 | 6 | 3 | 4 |
| 1546 | Kiyosato-cho | 3500 | 1 | 1 | 2 | 1 | 1 |
| 1547 | Koshimizu-cho | 4444 | 1 | 2 | 3 | 1 | 1 |
| 1549 | Kunneppu-cho | 4312 | 1 | 2 | 3 | 1 | 1 |
| 1550 | Oketo-cho | 2456 | 2 | 2 | 2 | 1 | 1 |
| 1552 | Saroma-cho | 4302 | 2 | 2 | 3 | 1 | 2 |
| 1555 | Engaru-cho | 17898 | 11 | 13 | 17 | 8 | 9 |
| 1559 | Yubetsu-cho | 7623 | 4 | 4 | 8 | 4 | 2 |
| 1560 | Takinoue-cho | 2095 | 1 | 1 | 2 | 1 | 1 |
| 1561 | Okoppe-cho | 3190 | 2 | 2 | 2 | 2 | 1 |
| 1562 | Nishiokoppe-mura | 975 | 0 | 0 | 1 | 0 | 0 |
| 1563 | Omu-cho | 3616 | 1 | 3 | 3 | 2 | 1 |
| 1564 | Ozora-cho | 6250 | 2 | 2 | 6 | 2 | 2 |
| 1571 | Toyoura-cho | 3671 | 2 | 3 | 3 | 2 | 2 |
| 1575 | Sobetsu-cho | 2451 | 1 | 1 | 2 | 1 | 1 |
| 1578 | Shiraoi-cho | 14213 | 8 | 10 | 21 | 8 | 10 |
| 1581 | Atsuma-cho | 4368 | 1 | 2 | 2 | 1 | 1 |
| 1584 | Toyako-cho | 7443 | 5 | 5 | 9 | 4 | 3 |
| 1585 | Abira-cho | 6874 | 4 | 5 | 8 | 6 | 6 |
| 1586 | Mukawa-cho | 6632 | 2 | 3 | 4 | 2 | 2 |
| 1601 | Hidaka-cho | 10131 | 4 | 7 | 7 | 3 | 4 |
| 1602 | Biratori-cho | 4396 | 2 | 4 | 5 | 3 | 3 |
| 1604 | Niikappu-cho | 4983 | 2 | 4 | 4 | 2 | 3 |
| 1607 | Urakawa-cho | 10422 | 5 | 9 | 13 | 7 | 7 |
| 1608 | Samani-cho | 3482 | 2 | 3 | 5 | 2 | 2 |
| 1609 | Erimo-cho | 3989 | 3 | 3 | 6 | 3 | 3 |
| 1610 | Shinhidaka-cho | 18911 | 10 | 14 | 18 | 11 | 10 |
| 1631 | Otofuke-cho | 43428 | 20 | 32 | 34 | 25 | 22 |
| 1632 | Shihoro-cho | 5514 | 3 | 3 | 4 | 2 | 2 |
| 1633 | Kamishihoro-cho | 4051 | 2 | 2 | 3 | 2 | 2 |
| 1634 | Shikaoi-cho | 5133 | 2 | 2 | 3 | 2 | 2 |
| 1635 | Shintoku-cho | 5335 | 3 | 3 | 4 | 2 | 2 |
| 1636 | Shimizu-cho | 8682 | 6 | 6 | 9 | 4 | 3 |
| 1637 | Memuro-cho | 17172 | 8 | 14 | 18 | 11 | 11 |
| 1638 | Nakasatsunai-mura | 3711 | 2 | 3 | 5 | 3 | 2 |
| 1639 | Sarabetsu-mura | 2940 | 1 | 2 | 2 | 1 | 1 |
| 1641 | Taiki-cho | 5134 | 3 | 3 | 6 | 3 | 2 |
| 1642 | Hiroo-cho | 5728 | 3 | 4 | 8 | 3 | 3 |
| 1643 | Makubetsu-cho | 25937 | 11 | 15 | 18 | 9 | 11 |
| 1644 | Ikeda-cho | 5574 | 3 | 4 | 8 | 4 | 3 |
| 1645 | Toyokoro-cho | 2573 | 2 | 2 | 1 | 1 | 1 |
| 1646 | Hombetsu-cho | 5801 | 3 | 4 | 6 | 2 | 2 |
| 1647 | Ashoro-cho | 5729 | 2 | 2 | 4 | 2 | 2 |
| 1648 | Rikubetsu-cho | 2025 | 1 | 1 | 2 | 1 | 2 |
| 1649 | Urahoro-cho | 3848 | 2 | 2 | 3 | 2 | 1 |
| 1661 | Kushiro-cho | 17652 | 8 | 12 | 23 | 10 | 7 |
| 1662 | Akkeshi-cho | 8123 | 3 | 5 | 7 | 3 | 2 |
| 1663 | Hamanaka-cho | 5091 | 2 | 3 | 4 | 2 | 2 |
| 1664 | Shibecha-cho | 6575 | 3 | 2 | 4 | 2 | 2 |
| 1665 | Teshikaga-cho | 6470 | 3 | 4 | 9 | 4 | 3 |
| 1667 | Tsurui-mura | 2277 | 1 | 1 | 2 | 1 | 1 |
| 1668 | Shiranuka-cho | 5848 | 2 | 4 | 8 | 3 | 4 |
| 1691 | Betsukai-cho | 13746 | 2 | 5 | 6 | 4 | 6 |
| 1692 | Nakashibetsu-cho | 22611 | 11 | 16 | 20 | 11 | 14 |
| 1693 | Shibetsu-cho | 4456 | 2 | 4 | 5 | 3 | 3 |
| 1694 | Rausu-cho | 4286 | 2 | 4 | 6 | 3 | 3 |

Appendix Table 1-3. Estimated number of short-stay service recipients

in administration units of Hokkaido in 2030

| **J-Code** | **Administration District** | **Total Population** | **Level 1** | **Level 2** | **Level 3** | **Level 4** | **Level 5** |
| --- | --- | --- | --- | --- | --- | --- | --- |
| 1101 | Sapporo C., Chuo-ku | 264549 | 129 | 192 | 242 | 132 | 198 |
| 1102 | Sapporo C., Kita-ku | 289404 | 168 | 210 | 413 | 294 | 238 |
| 1103 | Sapporo C., Higashi-ku | 265394 | 166 | 210 | 366 | 262 | 234 |
| 1104 | Sapporo C., Shiroishi-ku | 213756 | 126 | 171 | 292 | 175 | 151 |
| 1105 | Sapporo C., Toyohira-ku | 225883 | 139 | 186 | 292 | 205 | 237 |
| 1106 | Sapporo C., Minami-ku | 123342 | 79 | 90 | 145 | 61 | 62 |
| 1107 | Sapporo C., Nishi-ku | 212866 | 118 | 154 | 284 | 194 | 160 |
| 1108 | Sapporo C., Atsubetsu-ku | 118177 | 60 | 86 | 173 | 79 | 68 |
| 1109 | Sapporo C., Teine-ku | 137711 | 38 | 100 | 160 | 68 | 178 |
| 1110 | Sapporo C., Kiyota-ku | 108401 | 51 | 79 | 151 | 79 | 78 |
| 1202 | Hakodate C. | 215148 | 90 | 156 | 316 | 166 | 125 |
| 1203 | Otaru C. | 89561 | 40 | 65 | 131 | 51 | 55 |
| 1204 | Asahikawa C. | 301879 | 146 | 219 | 420 | 201 | 207 |
| 1205 | Muroran C. | 67834 | 28 | 49 | 99 | 62 | 88 |
| 1206 | Kushiro C. | 146422 | 67 | 106 | 206 | 101 | 97 |
| 1207 | Obihiro C. | 164213 | 66 | 119 | 231 | 85 | 181 |
| 1208 | Kitami C. | 104061 | 48 | 76 | 151 | 53 | 74 |
| 1209 | Yubari C. | 4603 | 2 | 3 | 7 | 3 | 3 |
| 1210 | Iwamizawa C. | 66101 | 40 | 48 | 97 | 33 | 41 |
| 1211 | Abashiri C. | 32528 | 12 | 24 | 40 | 10 | 42 |
| 1212 | Rumoi C. | 15593 | 8 | 11 | 23 | 12 | 10 |
| 1213 | Tomakomai C. | 161365 | 69 | 117 | 233 | 106 | 208 |
| 1214 | Wakkanai C. | 26795 | 11 | 19 | 39 | 21 | 16 |
| 1215 | Bibai C. | 15173 | 8 | 11 | 22 | 8 | 9 |
| 1216 | Ashibetsu C. | 9328 | 6 | 7 | 11 | 5 | 5 |
| 1217 | Ebetsu C. | 106082 | 62 | 77 | 149 | 50 | 62 |
| 1218 | Akabira C. | 6812 | 5 | 5 | 6 | 3 | 3 |
| 1219 | Mombetsu C. | 17447 | 10 | 13 | 26 | 10 | 11 |
| 1220 | Shibetsu C. | 14614 | 10 | 11 | 20 | 6 | 9 |
| 1221 | Nayoro C. | 23677 | 8 | 17 | 26 | 9 | 31 |
| 1222 | Mikasa C. | 5502 | 2 | 3 | 8 | 3 | 7 |
| 1223 | Nemuro C. | 19610 | 9 | 14 | 29 | 14 | 12 |
| 1224 | Chitose C. | 95985 | 59 | 70 | 89 | 42 | 43 |
| 1225 | Takikawa C. | 33703 | 13 | 24 | 49 | 19 | 21 |
| 1226 | Sunagawa C. | 13176 | 8 | 10 | 19 | 7 | 8 |
| 1227 | Utashinai C. | 1813 | 1 | 1 | 2 | 1 | 1 |
| 1228 | Fukagawa C. | 16540 | 10 | 12 | 20 | 8 | 9 |
| 1229 | Furano C. | 18681 | 8 | 14 | 27 | 13 | 12 |
| 1230 | Noboribetsu C. | 41122 | 18 | 30 | 60 | 21 | 28 |
| 1231 | Eniwa C. | 67129 | 41 | 49 | 98 | 64 | 58 |
| 1233 | Date C. | 29882 | 14 | 22 | 42 | 11 | 25 |
| 1234 | Kitahiroshima C. | 52264 | 21 | 38 | 77 | 38 | 33 |
| 1235 | Ishikari C. | 48785 | 18 | 35 | 61 | 18 | 46 |
| 1236 | Hokuto C. | 38388 | 13 | 28 | 56 | 22 | 22 |
| 1303 | Tobetsu-cho | 12736 | 8 | 9 | 11 | 6 | 4 |
| 1304 | Shinshinotsu-mura | 2563 | 1 | 2 | 4 | 1 | 3 |
| 1331 | Matsumae-cho | 4090 | 2 | 3 | 6 | 2 | 3 |
| 1332 | Fukushima-cho | 2592 | 2 | 2 | 3 | 1 | 1 |
| 1333 | Shiriuchi-cho | 3370 | 2 | 2 | 5 | 2 | 2 |
| 1334 | Kikonai-cho | 2691 | 2 | 1 | 2 | 1 | 1 |
| 1337 | Nanae-cho | 24696 | 14 | 18 | 33 | 15 | 18 |
| 1343 | Shikabe-cho | 3272 | 2 | 2 | 3 | 2 | 1 |
| 1345 | Mori-machi | 10839 | 5 | 8 | 16 | 7 | 6 |
| 1346 | Yakumo-cho | 12446 | 7 | 9 | 18 | 9 | 8 |
| 1347 | Oshamambe-cho | 4033 | 3 | 2 | 3 | 2 | 2 |
| 1361 | Esashi-cho | 5785 | 4 | 4 | 8 | 2 | 5 |
| 1362 | Kaminokuni-cho | 3067 | 1 | 2 | 4 | 2 | 2 |
| 1363 | Assabu-cho | 2822 | 2 | 2 | 4 | 1 | 2 |
| 1364 | Otobe-cho | 2510 | 1 | 2 | 3 | 2 | 2 |
| 1367 | Okushiri-cho | 1671 | 1 | 1 | 1 | 1 | 1 |
| 1370 | Imakane-cho | 4208 | 2 | 3 | 6 | 2 | 3 |
| 1371 | Setana-cho | 5569 | 3 | 4 | 8 | 3 | 4 |
| 1391 | Shimamaki-mura | 979 | 0 | 1 | 1 | 1 | 1 |
| 1392 | Suttsu-cho | 2145 | 1 | 2 | 2 | 2 | 2 |
| 1393 | Kuromatsunai-cho | 2345 | 1 | 2 | 3 | 1 | 3 |
| 1394 | Rankoshi-cho | 3478 | 2 | 3 | 5 | 2 | 2 |
| 1395 | Niseko-cho | 4910 | 2 | 4 | 6 | 4 | 4 |
| 1396 | Makkari-mura | 1607 | 1 | 1 | 2 | 1 | 1 |
| 1397 | Rusutsu-mura | 1488 | 1 | 1 | 2 | 1 | 1 |
| 1398 | Kimobetsu-cho | 1635 | 0 | 1 | 2 | 1 | 1 |
| 1399 | Kyogoku-cho | 2246 | 1 | 2 | 3 | 2 | 2 |
| 1400 | Kutchan-cho | 12663 | 6 | 9 | 14 | 9 | 8 |
| 1401 | Kyowa-cho | 4801 | 2 | 3 | 7 | 3 | 3 |
| 1402 | Iwanai-cho | 8987 | 4 | 6 | 13 | 4 | 5 |
| 1403 | Tomari-mura | 1400 | 1 | 1 | 2 | 1 | 1 |
| 1404 | Kamoenai-mura | 650 | 0 | 0 | 1 | 0 | 0 |
| 1405 | Shakotan-cho | 1241 | 1 | 1 | 1 | 1 | 0 |
| 1406 | Furubira-cho | 1992 | 1 | 1 | 3 | 1 | 1 |
| 1407 | Niki-cho | 2780 | 1 | 2 | 3 | 1 | 2 |
| 1408 | Yoichi-cho | 14430 | 8 | 10 | 21 | 8 | 9 |
| 1409 | Akaigawa-mura | 781 | 0 | 1 | 1 | 0 | 0 |
| 1423 | Nanporo-cho | 5854 | 4 | 3 | 5 | 3 | 1 |
| 1424 | Naie-cho | 4169 | 3 | 3 | 6 | 2 | 2 |
| 1425 | Kamisunagawa-cho | 2046 | 1 | 1 | 3 | 1 | 1 |
| 1427 | Yuni-cho | 3748 | 2 | 3 | 5 | 2 | 2 |
| 1428 | Naganuma-cho | 8946 | 7 | 6 | 7 | 4 | 6 |
| 1429 | Kuriyama-cho | 9506 | 5 | 7 | 14 | 5 | 7 |
| 1430 | Tsukigata-cho | 3632 | 1 | 3 | 5 | 3 | 2 |
| 1431 | Urausu-cho | 1414 | 1 | 1 | 2 | 1 | 1 |
| 1432 | Shintotsukawa-cho | 5317 | 3 | 4 | 7 | 4 | 3 |
| 1433 | Moseushi-cho | 2003 | 1 | 1 | 3 | 1 | 1 |
| 1434 | Chippubetsu-cho | 1732 | 1 | 1 | 1 | 1 | 0 |
| 1436 | Uryu-cho | 1899 | 1 | 1 | 2 | 1 | 1 |
| 1437 | Hokuryu-cho | 1393 | 1 | 1 | 1 | 1 | 1 |
| 1438 | Numata-cho | 2062 | 1 | 1 | 2 | 1 | 1 |
| 1452 | Takasu-cho | 6018 | 3 | 4 | 9 | 3 | 4 |
| 1453 | Higashikagura-cho | 10307 | 5 | 7 | 13 | 10 | 6 |
| 1454 | Tohma-cho | 5230 | 3 | 4 | 4 | 3 | 2 |
| 1455 | Pippu-cho | 2743 | 2 | 2 | 4 | 1 | 2 |
| 1456 | Aibetsu-cho | 2008 | 1 | 1 | 3 | 1 | 2 |
| 1457 | Kamikawa-cho | 2537 | 1 | 1 | 3 | 1 | 1 |
| 1458 | Higashikawa-cho | 7558 | 4 | 5 | 11 | 7 | 7 |
| 1459 | Biei-cho | 8123 | 4 | 6 | 11 | 5 | 5 |
| 1460 | Kamifurano-cho | 8309 | 4 | 6 | 12 | 7 | 6 |
| 1461 | Nakafurano-cho | 3856 | 2 | 3 | 5 | 2 | 2 |
| 1462 | Minamifurano-cho | 1921 | 1 | 1 | 2 | 2 | 1 |
| 1463 | Shimukappu-mura | 728 | 0 | 1 | 1 | 0 | 1 |
| 1464 | Wassamu-cho | 2473 | 1 | 2 | 3 | 2 | 2 |
| 1465 | Kembuchi-cho | 2322 | 1 | 2 | 3 | 2 | 1 |
| 1468 | Shimokawa-cho | 2443 | 1 | 2 | 4 | 2 | 2 |
| 1469 | Bifuka-cho | 3231 | 1 | 2 | 5 | 2 | 3 |
| 1470 | Otoineppu-mura | 487 | 0 | 0 | 1 | 0 | 0 |
| 1471 | Nakagawa-cho | 1188 | 0 | 1 | 1 | 0 | 1 |
| 1472 | Horokanai-cho | 961 | 1 | 1 | 1 | 0 | 1 |
| 1481 | Mashike-cho | 2969 | 2 | 2 | 2 | 1 | 1 |
| 1482 | Obira-cho | 2278 | 1 | 2 | 3 | 1 | 1 |
| 1483 | Tomamae-cho | 2050 | 1 | 1 | 3 | 1 | 1 |
| 1484 | Haboro-cho | 5341 | 3 | 4 | 8 | 3 | 7 |
| 1485 | Shosambetsu-mura | 769 | 1 | 1 | 1 | 0 | 0 |
| 1486 | Embetsu-cho | 1976 | 1 | 1 | 3 | 1 | 1 |
| 1487 | Teshio-cho | 2239 | 1 | 1 | 2 | 1 | 1 |
| 1511 | Sarufutsu-mura | 2189 | 1 | 2 | 3 | 2 | 3 |
| 1512 | Hamatombetsu-cho | 2785 | 2 | 2 | 3 | 2 | 4 |
| 1513 | Nakatombetsu-cho | 1149 | 1 | 1 | 2 | 1 | 1 |
| 1514 | Esashi-cho | 6268 | 2 | 4 | 8 | 2 | 7 |
| 1516 | Toyotomi-cho | 2991 | 2 | 2 | 2 | 1 | 1 |
| 1517 | Rebun-cho | 1803 | 1 | 1 | 3 | 2 | 1 |
| 1518 | Rishiri-cho | 1381 | 1 | 1 | 1 | 0 | 1 |
| 1519 | Rishirifuji-cho | 1801 | 1 | 1 | 2 | 1 | 1 |
| 1520 | Horonobe-cho | 1866 | 1 | 1 | 3 | 1 | 2 |
| 1543 | Bihoro-cho | 16156 | 10 | 12 | 24 | 9 | 10 |
| 1544 | Tsubetsu-cho | 3398 | 2 | 2 | 5 | 2 | 2 |
| 1545 | Shari-cho | 9826 | 3 | 5 | 8 | 5 | 13 |
| 1546 | Kiyosato-cho | 3133 | 1 | 2 | 4 | 2 | 4 |
| 1547 | Koshimizu-cho | 4106 | 2 | 3 | 6 | 2 | 3 |
| 1549 | Kunneppu-cho | 3911 | 3 | 3 | 6 | 2 | 2 |
| 1550 | Oketo-cho | 2155 | 1 | 2 | 3 | 1 | 1 |
| 1552 | Saroma-cho | 3794 | 3 | 3 | 6 | 2 | 3 |
| 1555 | Engaru-cho | 16385 | 7 | 12 | 20 | 5 | 14 |
| 1559 | Yubetsu-cho | 6865 | 4 | 5 | 10 | 3 | 4 |
| 1560 | Takinoue-cho | 1803 | 1 | 1 | 1 | 1 | 1 |
| 1561 | Okoppe-cho | 2860 | 2 | 2 | 3 | 2 | 3 |
| 1562 | Nishiokoppe-mura | 900 | 0 | 0 | 0 | 0 | 0 |
| 1563 | Omu-cho | 3199 | 2 | 2 | 5 | 3 | 2 |
| 1564 | Ozora-cho | 5699 | 4 | 4 | 8 | 3 | 3 |
| 1571 | Toyoura-cho | 3381 | 1 | 2 | 4 | 1 | 3 |
| 1575 | Sobetsu-cho | 2225 | 2 | 2 | 2 | 1 | 3 |
| 1578 | Shiraoi-cho | 12455 | 7 | 9 | 18 | 7 | 8 |
| 1581 | Atsuma-cho | 4048 | 2 | 3 | 6 | 2 | 3 |
| 1584 | Toyako-cho | 6561 | 4 | 5 | 8 | 5 | 4 |
| 1585 | Abira-cho | 6236 | 3 | 5 | 9 | 5 | 4 |
| 1586 | Mukawa-cho | 5755 | 4 | 4 | 8 | 3 | 3 |
| 1601 | Hidaka-cho | 9056 | 5 | 7 | 13 | 7 | 6 |
| 1602 | Biratori-cho | 3968 | 2 | 3 | 6 | 2 | 3 |
| 1604 | Niikappu-cho | 4671 | 2 | 3 | 5 | 3 | 4 |
| 1607 | Urakawa-cho | 9193 | 5 | 7 | 13 | 8 | 5 |
| 1608 | Samani-cho | 3015 | 2 | 2 | 3 | 2 | 1 |
| 1609 | Erimo-cho | 3560 | 2 | 3 | 5 | 3 | 2 |
| 1610 | Shinhidaka-cho | 16817 | 8 | 12 | 25 | 12 | 11 |
| 1631 | Otofuke-cho | 42279 | 21 | 31 | 62 | 30 | 31 |
| 1632 | Shihoro-cho | 5217 | 4 | 4 | 6 | 3 | 3 |
| 1633 | Kamishihoro-cho | 3728 | 2 | 3 | 4 | 2 | 3 |
| 1634 | Shikaoi-cho | 4910 | 2 | 4 | 6 | 2 | 5 |
| 1635 | Shintoku-cho | 4882 | 3 | 4 | 7 | 2 | 5 |
| 1636 | Shimizu-cho | 8189 | 5 | 6 | 8 | 3 | 3 |
| 1637 | Memuro-cho | 16373 | 6 | 12 | 24 | 8 | 10 |
| 1638 | Nakasatsunai-mura | 3569 | 2 | 3 | 5 | 2 | 2 |
| 1639 | Sarabetsu-mura | 2809 | 1 | 2 | 3 | 1 | 4 |
| 1641 | Taiki-cho | 4827 | 2 | 3 | 5 | 2 | 2 |
| 1642 | Hiroo-cho | 5104 | 3 | 4 | 7 | 3 | 3 |
| 1643 | Makubetsu-cho | 25349 | 10 | 18 | 34 | 13 | 22 |
| 1644 | Ikeda-cho | 4940 | 3 | 4 | 4 | 2 | 3 |
| 1645 | Toyokoro-cho | 2311 | 2 | 2 | 2 | 1 | 1 |
| 1646 | Hombetsu-cho | 5061 | 4 | 4 | 7 | 2 | 3 |
| 1647 | Ashoro-cho | 5142 | 3 | 4 | 8 | 3 | 7 |
| 1648 | Rikubetsu-cho | 1815 | 1 | 1 | 2 | 1 | 1 |
| 1649 | Urahoro-cho | 3359 | 2 | 2 | 3 | 2 | 2 |
| 1661 | Kushiro-cho | 16402 | 11 | 12 | 24 | 8 | 9 |
| 1662 | Akkeshi-cho | 7305 | 5 | 5 | 10 | 4 | 5 |
| 1663 | Hamanaka-cho | 4643 | 3 | 4 | 6 | 3 | 3 |
| 1664 | Shibecha-cho | 6002 | 5 | 4 | 6 | 3 | 3 |
| 1665 | Teshikaga-cho | 5824 | 3 | 4 | 9 | 4 | 4 |
| 1667 | Tsurui-mura | 2140 | 2 | 2 | 3 | 1 | 3 |
| 1668 | Shiranuka-cho | 4904 | 4 | 4 | 5 | 2 | 2 |
| 1691 | Betsukai-cho | 12915 | 6 | 11 | 19 | 10 | 17 |
| 1692 | Nakashibetsu-cho | 21803 | 10 | 16 | 25 | 16 | 14 |
| 1693 | Shibetsu-cho | 4035 | 2 | 3 | 6 | 3 | 3 |
| 1694 | Rausu-cho | 3788 | 1 | 3 | 2 | 2 | 2 |

Appendix Table 1-4. Estimated number of short-stay service recipients

in administration units of Hokkaido in 2035

| **J-Code** | **Administration District** | **Total Population** | **Level １** | **Level ２** | **Level ３** | **Level ４** | **Level ５** |
| --- | --- | --- | --- | --- | --- | --- | --- |
| 1101 | Sapporo C., Chuo-ku | 266687 | 126 | 191 | 334 | 199 | 121 |
| 1102 | Sapporo C., Kita-ku | 285680 | 129 | 207 | 411 | 262 | 174 |
| 1103 | Sapporo C., Higashi-ku | 261908 | 130 | 223 | 413 | 256 | 155 |
| 1104 | Sapporo C., Shiroishi-ku | 211405 | 87 | 154 | 284 | 200 | 121 |
| 1105 | Sapporo C., Toyohira-ku | 224265 | 116 | 193 | 327 | 224 | 131 |
| 1106 | Sapporo C., Minami-ku | 115718 | 66 | 84 | 95 | 62 | 36 |
| 1107 | Sapporo C., Nishi-ku | 209203 | 84 | 152 | 290 | 171 | 120 |
| 1108 | Sapporo C., Atsubetsu-ku | 112474 | 76 | 82 | 148 | 45 | 52 |
| 1109 | Sapporo C., Teine-ku | 133690 | 56 | 97 | 165 | 126 | 87 |
| 1110 | Sapporo C., Kiyota-ku | 103430 | 55 | 75 | 143 | 67 | 64 |
| 1202 | Hakodate C. | 197467 | 89 | 143 | 289 | 93 | 116 |
| 1203 | Otaru C. | 79253 | 57 | 58 | 79 | 39 | 30 |
| 1204 | Asahikawa C. | 285138 | 150 | 207 | 394 | 178 | 167 |
| 1205 | Muroran C. | 61227 | 20 | 43 | 53 | 38 | 24 |
| 1206 | Kushiro C. | 135811 | 68 | 99 | 199 | 84 | 83 |
| 1207 | Obihiro C. | 160263 | 70 | 116 | 189 | 142 | 91 |
| 1208 | Kitami C. | 97226 | 52 | 71 | 125 | 68 | 58 |
| 1209 | Yubari C. | 3653 | 2 | 3 | 4 | 2 | 1 |
| 1210 | Iwamizawa C. | 59865 | 37 | 43 | 69 | 37 | 27 |
| 1211 | Abashiri C. | 30246 | 11 | 22 | 34 | 21 | 14 |
| 1212 | Rumoi C. | 13537 | 7 | 10 | 20 | 6 | 8 |
| 1213 | Tomakomai C. | 155212 | 70 | 125 | 222 | 150 | 99 |
| 1214 | Wakkanai C. | 23723 | 11 | 17 | 35 | 12 | 15 |
| 1215 | Bibai C. | 12947 | 10 | 9 | 14 | 5 | 6 |
| 1216 | Ashibetsu C. | 7856 | 5 | 6 | 8 | 3 | 3 |
| 1217 | Ebetsu C. | 99871 | 60 | 66 | 78 | 40 | 31 |
| 1218 | Akabira C. | 5685 | 4 | 4 | 7 | 3 | 2 |
| 1219 | Mombetsu C. | 15553 | 11 | 11 | 22 | 8 | 8 |
| 1220 | Shibetsu C. | 12970 | 7 | 9 | 11 | 8 | 5 |
| 1221 | Nayoro C. | 21789 | 9 | 16 | 31 | 14 | 14 |
| 1222 | Mikasa C. | 4610 | 2 | 3 | 4 | 3 | 2 |
| 1223 | Nemuro C. | 17330 | 10 | 13 | 25 | 10 | 10 |
| 1224 | Chitose C. | 94506 | 52 | 63 | 117 | 63 | 40 |
| 1225 | Takikawa C. | 30952 | 21 | 22 | 41 | 17 | 16 |
| 1226 | Sunagawa C. | 11720 | 8 | 9 | 15 | 7 | 6 |
| 1227 | Utashinai C. | 1410 | 1 | 1 | 1 | 0 | 1 |
| 1228 | Fukagawa C. | 14774 | 9 | 11 | 13 | 7 | 6 |
| 1229 | Furano C. | 17169 | 12 | 12 | 23 | 9 | 8 |
| 1230 | Noboribetsu C. | 37845 | 21 | 27 | 47 | 26 | 20 |
| 1231 | Eniwa C. | 65292 | 26 | 47 | 80 | 61 | 41 |
| 1233 | Date C. | 27920 | 10 | 20 | 30 | 22 | 16 |
| 1234 | Kitahiroshima C. | 49371 | 25 | 36 | 72 | 29 | 28 |
| 1235 | Ishikari C. | 45190 | 18 | 33 | 58 | 41 | 28 |
| 1236 | Hokuto C. | 35437 | 26 | 26 | 43 | 18 | 17 |
| 1303 | Tobetsu T. | 11346 | 8 | 7 | 6 | 4 | 2 |
| 1304 | Shinshinotsu V. | 2320 | 1 | 2 | 3 | 2 | 1 |
| 1331 | Matsumae T. | 3263 | 2 | 2 | 3 | 1 | 1 |
| 1332 | Fukushima T. | 2104 | 1 | 2 | 2 | 1 | 1 |
| 1333 | Shiriuchi T. | 2965 | 2 | 2 | 3 | 1 | 1 |
| 1334 | Kikonai T. | 2202 | 1 | 2 | 2 | 1 | 1 |
| 1337 | Nanae T. | 23155 | 12 | 17 | 29 | 14 | 13 |
| 1343 | Shikabe T. | 2939 | 2 | 2 | 2 | 1 | 1 |
| 1345 | Mori-machi | 9357 | 4 | 7 | 12 | 5 | 5 |
| 1346 | Yakumo T. | 10960 | 6 | 8 | 16 | 6 | 7 |
| 1347 | Oshamambe T. | 3574 | 2 | 3 | 4 | 2 | 1 |
| 1361 | Esashi T. | 5052 | 3 | 4 | 6 | 4 | 3 |
| 1362 | Kaminokuni T. | 2547 | 2 | 2 | 2 | 1 | 1 |
| 1363 | Assabu T. | 2464 | 1 | 2 | 3 | 2 | 2 |
| 1364 | Otobe T. | 2109 | 1 | 2 | 2 | 1 | 1 |
| 1367 | Okushiri T. | 1400 | 1 | 1 | 2 | 1 | 1 |
| 1370 | Imakane T. | 3795 | 2 | 3 | 5 | 3 | 2 |
| 1371 | Setana T. | 4745 | 2 | 3 | 4 | 2 | 1 |
| 1391 | Shimamaki V. | 835 | 1 | 1 | 1 | 0 | 0 |
| 1392 | Suttsu T. | 1887 | 1 | 1 | 3 | 1 | 1 |
| 1393 | Kuromatsunai T. | 2141 | 1 | 2 | 2 | 1 | 1 |
| 1394 | Rankoshi T. | 3065 | 2 | 2 | 4 | 1 | 2 |
| 1395 | Niseko T. | 4827 | 1 | 3 | 6 | 4 | 3 |
| 1396 | Makkari V. | 1459 | 1 | 1 | 2 | 1 | 1 |
| 1397 | Rusutsu V. | 1367 | 1 | 1 | 2 | 1 | 1 |
| 1398 | Kimobetsu T. | 1456 | 1 | 1 | 2 | 1 | 1 |
| 1399 | Kyogoku T. | 1986 | 1 | 1 | 2 | 1 | 1 |
| 1400 | Kutchan T. | 11804 | 6 | 10 | 19 | 11 | 7 |
| 1401 | Kyowa T. | 4359 | 3 | 3 | 5 | 2 | 2 |
| 1402 | Iwanai T. | 7827 | 4 | 6 | 9 | 4 | 4 |
| 1403 | Tomari V. | 1296 | 1 | 1 | 2 | 1 | 1 |
| 1404 | Kamoenai V. | 559 | 0 | 0 | 0 | 0 | 0 |
| 1405 | Shakotan T. | 1024 | 1 | 0 | 1 | 1 | 0 |
| 1406 | Furubira T. | 1671 | 1 | 1 | 2 | 1 | 1 |
| 1407 | Niki T. | 2560 | 1 | 2 | 3 | 2 | 2 |
| 1408 | Yoichi T. | 12838 | 9 | 9 | 17 | 6 | 6 |
| 1409 | Akaigawa V. | 681 | 0 | 0 | 1 | 0 | 0 |
| 1423 | Nanporo T. | 5214 | 4 | 3 | 2 | 1 | 1 |
| 1424 | Naie T. | 3703 | 2 | 3 | 3 | 2 | 1 |
| 1425 | Kamisunagawa T. | 1683 | 1 | 1 | 2 | 1 | 1 |
| 1427 | Yuni T. | 3276 | 3 | 2 | 3 | 1 | 1 |
| 1428 | Naganuma T. | 8192 | 4 | 3 | 6 | 4 | 2 |
| 1429 | Kuriyama T. | 8531 | 5 | 6 | 10 | 6 | 5 |
| 1430 | Tsukigata T. | 3293 | 1 | 2 | 5 | 2 | 2 |
| 1431 | Urausu T. | 1242 | 1 | 1 | 1 | 1 | 1 |
| 1432 | Shintotsukawa T. | 4815 | 3 | 3 | 4 | 2 | 1 |
| 1433 | Moseushi T. | 1690 | 1 | 1 | 2 | 1 | 1 |
| 1434 | Chippubetsu T. | 1505 | 1 | 1 | 1 | 1 | 0 |
| 1436 | Uryu T. | 1668 | 1 | 1 | 2 | 1 | 1 |
| 1437 | Hokuryu T. | 1220 | 0 | 1 | 1 | 1 | 1 |
| 1438 | Numata T. | 1754 | 1 | 1 | 2 | 1 | 1 |
| 1452 | Takasu T. | 5663 | 2 | 4 | 7 | 5 | 4 |
| 1453 | Higashikagura T. | 10123 | 5 | 7 | 15 | 5 | 5 |
| 1454 | Tohma T. | 4742 | 3 | 3 | 4 | 2 | 1 |
| 1455 | Pippu T. | 2418 | 2 | 2 | 3 | 1 | 1 |
| 1456 | Aibetsu T. | 1730 | 1 | 1 | 2 | 1 | 1 |
| 1457 | Kamikawa T. | 2140 | 1 | 2 | 3 | 1 | 2 |
| 1458 | Higashikawa T. | 7268 | 3 | 5 | 8 | 4 | 5 |
| 1459 | Biei T. | 7441 | 4 | 4 | 7 | 4 | 2 |
| 1460 | Kamifurano T. | 7470 | 4 | 5 | 11 | 4 | 4 |
| 1461 | Nakafurano T. | 3481 | 2 | 3 | 4 | 2 | 2 |
| 1462 | Minamifurano T. | 1730 | 1 | 1 | 3 | 2 | 1 |
| 1463 | Shimukappu V. | 612 | 0 | 0 | 1 | 1 | 0 |
| 1464 | Wassamu T. | 2146 | 1 | 1 | 3 | 1 | 1 |
| 1465 | Kembuchi T. | 2048 | 1 | 1 | 3 | 1 | 1 |
| 1468 | Shimokawa T. | 2126 | 1 | 2 | 3 | 1 | 1 |
| 1469 | Bifuka T. | 2826 | 2 | 2 | 3 | 2 | 2 |
| 1470 | Otoineppu V. | 408 | 0 | 0 | 0 | 0 | 0 |
| 1471 | Nakagawa T. | 1022 | 0 | 1 | 1 | 1 | 1 |
| 1472 | Horokanai T. | 822 | 0 | 1 | 1 | 0 | 0 |
| 1481 | Mashike T. | 2537 | 1 | 2 | 3 | 1 | 1 |
| 1482 | Obira T. | 1975 | 1 | 1 | 2 | 1 | 1 |
| 1483 | Tomamae T. | 1739 | 1 | 1 | 2 | 1 | 1 |
| 1484 | Haboro T. | 4722 | 2 | 3 | 5 | 4 | 3 |
| 1485 | Shosambetsu V. | 661 | 0 | 0 | 1 | 0 | 0 |
| 1486 | Embetsu T. | 1741 | 1 | 1 | 2 | 2 | 1 |
| 1487 | Teshio T. | 1941 | 1 | 1 | 3 | 1 | 1 |
| 1511 | Sarufutsu V. | 2033 | 1 | 2 | 2 | 1 | 1 |
| 1512 | Hamatombetsu T. | 2450 | 1 | 2 | 3 | 2 | 2 |
| 1513 | Nakatombetsu T. | 976 | 1 | 1 | 1 | 1 | 0 |
| 1514 | Esashi T. | 5588 | 3 | 4 | 7 | 5 | 3 |
| 1516 | Toyotomi T. | 2669 | 1 | 2 | 3 | 1 | 2 |
| 1517 | Rebun T. | 1543 | 1 | 1 | 2 | 1 | 1 |
| 1518 | Rishiri T. | 1152 | 0 | 1 | 2 | 1 | 1 |
| 1519 | Rishirifuji T. | 1551 | 1 | 1 | 2 | 1 | 1 |
| 1520 | Horonobe T. | 1689 | 1 | 1 | 2 | 1 | 2 |
| 1543 | Bihoro T. | 14723 | 8 | 11 | 20 | 8 | 8 |
| 1544 | Tsubetsu T. | 2922 | 2 | 2 | 3 | 2 | 1 |
| 1545 | Shari T. | 9006 | 4 | 7 | 11 | 8 | 6 |
| 1546 | Kiyosato T. | 2784 | 1 | 2 | 3 | 2 | 2 |
| 1547 | Koshimizu T. | 3782 | 2 | 3 | 6 | 2 | 2 |
| 1549 | Kunneppu T. | 3514 | 2 | 3 | 4 | 2 | 1 |
| 1550 | Oketo T. | 1870 | 1 | 1 | 2 | 1 | 1 |
| 1552 | Saroma T. | 3318 | 2 | 2 | 3 | 2 | 1 |
| 1555 | Engaru T. | 14914 | 8 | 11 | 15 | 8 | 7 |
| 1559 | Yubetsu T. | 6153 | 4 | 4 | 8 | 4 | 3 |
| 1560 | Takinoue T. | 1558 | 1 | 1 | 1 | 1 | 1 |
| 1561 | Okoppe T. | 2555 | 1 | 2 | 3 | 2 | 1 |
| 1562 | Nishiokoppe V. | 842 | 1 | 1 | 1 | 1 | 1 |
| 1563 | Omu T. | 2811 | 1 | 2 | 4 | 2 | 2 |
| 1564 | Ozora T. | 5181 | 3 | 4 | 4 | 3 | 2 |
| 1571 | Toyoura T. | 3116 | 1 | 2 | 5 | 2 | 2 |
| 1575 | Sobetsu T. | 2017 | 1 | 1 | 2 | 1 | 1 |
| 1578 | Shiraoi T. | 10760 | 7 | 8 | 9 | 5 | 4 |
| 1581 | Atsuma T. | 3742 | 2 | 3 | 4 | 3 | 2 |
| 1584 | Toyako T. | 5722 | 4 | 3 | 5 | 3 | 1 |
| 1585 | Abira T. | 5620 | 3 | 4 | 8 | 3 | 3 |
| 1586 | Mukawa T. | 4937 | 3 | 4 | 5 | 4 | 3 |
| 1601 | Hidaka T. | 8045 | 3 | 6 | 12 | 5 | 5 |
| 1602 | Biratori T. | 3561 | 2 | 3 | 4 | 2 | 2 |
| 1604 | Niikappu T. | 4357 | 2 | 3 | 6 | 4 | 3 |
| 1607 | Urakawa T. | 8019 | 4 | 6 | 12 | 4 | 5 |
| 1608 | Samani T. | 2587 | 1 | 1 | 2 | 1 | 1 |
| 1609 | Erimo T. | 3151 | 1 | 2 | 5 | 1 | 2 |
| 1610 | Shinhidaka T. | 14822 | 8 | 11 | 22 | 8 | 9 |
| 1631 | Otofuke T. | 40983 | 17 | 30 | 48 | 35 | 24 |
| 1632 | Shihoro T. | 4946 | 2 | 4 | 6 | 2 | 4 |
| 1633 | Kamishihoro T. | 3432 | 2 | 2 | 4 | 1 | 3 |
| 1634 | Shikaoi T. | 4703 | 2 | 3 | 4 | 2 | 3 |
| 1635 | Shintoku T. | 4449 | 2 | 3 | 6 | 3 | 3 |
| 1636 | Shimizu T. | 7707 | 2 | 4 | 7 | 4 | 4 |
| 1637 | Memuro T. | 15559 | 9 | 11 | 19 | 10 | 7 |
| 1638 | Nakasatsunai V. | 3406 | 2 | 2 | 3 | 2 | 1 |
| 1639 | Sarabetsu V. | 2692 | 1 | 2 | 4 | 2 | 2 |
| 1641 | Taiki T. | 4532 | 3 | 3 | 4 | 2 | 4 |
| 1642 | Hiroo T. | 4510 | 2 | 3 | 4 | 2 | 1 |
| 1643 | Makubetsu T. | 24651 | 11 | 18 | 29 | 21 | 15 |
| 1644 | Ikeda T. | 4333 | 3 | 2 | 3 | 2 | 1 |
| 1645 | Toyokoro T. | 2068 | 1 | 2 | 3 | 1 | 2 |
| 1646 | Hombetsu T. | 4368 | 3 | 3 | 4 | 2 | 2 |
| 1647 | Ashoro T. | 4585 | 2 | 3 | 5 | 3 | 3 |
| 1648 | Rikubetsu T. | 1615 | 1 | 1 | 2 | 1 | 1 |
| 1649 | Urahoro T. | 2920 | 1 | 2 | 3 | 1 | 1 |
| 1661 | Kushiro T. | 15059 | 8 | 9 | 12 | 6 | 5 |
| 1662 | Akkeshi T. | 6511 | 4 | 5 | 7 | 4 | 2 |
| 1663 | Hamanaka T. | 4200 | 2 | 3 | 5 | 4 | 3 |
| 1664 | Shibecha T. | 5457 | 3 | 4 | 4 | 2 | 3 |
| 1665 | Teshikaga T. | 5199 | 4 | 4 | 7 | 3 | 3 |
| 1667 | Tsurui V. | 1991 | 1 | 1 | 2 | 1 | 1 |
| 1668 | Shiranuka T. | 4054 | 2 | 3 | 3 | 2 | 2 |
| 1691 | Betsukai T. | 12064 | 5 | 9 | 13 | 11 | 8 |
| 1692 | Nakashibetsu T. | 20853 | 8 | 15 | 31 | 12 | 13 |
| 1693 | Shibetsu T. | 3623 | 2 | 3 | 5 | 2 | 2 |
| 1694 | Rausu T. | 3312 | 1 | 3 | 3 | 1 | 2 |

Appendix Table 1-5. Estimated number of short-stay service recipients

in administration units of Hokkaido in 2040

| **J-code** | **Administration District** | **Total population** | **Level １** | **Level ２** | **Level ３** | **Level ４** | **Level ５** |
| --- | --- | --- | --- | --- | --- | --- | --- |
| 1101 | Sapporo C., Chuo-ku | 265576 | 125 | 193 | 389 | 172 | 136 |
| 1102 | Sapporo C., Kita-ku | 279225 | 138 | 145 | 208 | 139 | 83 |
| 1103 | Sapporo C., Higashi-ku | 256072 | 124 | 136 | 193 | 127 | 91 |
| 1104 | Sapporo C., Shiroishi-ku | 207066 | 108 | 133 | 212 | 103 | 86 |
| 1105 | Sapporo C., Toyohira-ku | 220498 | 106 | 133 | 207 | 110 | 84 |
| 1106 | Sapporo C., Minami-ku | 107107 | 57 | 78 | 84 | 48 | 26 |
| 1107 | Sapporo C., Nishi-ku | 203866 | 109 | 130 | 174 | 101 | 76 |
| 1108 | Sapporo C., Atsubetsu-ku | 105693 | 77 | 53 | 81 | 53 | 20 |
| 1109 | Sapporo C., Teine-ku | 128513 | 50 | 55 | 103 | 64 | 40 |
| 1110 | Sapporo C., Kiyota-ku | 97375 | 60 | 67 | 82 | 48 | 29 |
| 1202 | Hakodate C. | 179807 | 138 | 109 | 121 | 89 | 51 |
| 1203 | Otaru C. | 69422 | 48 | 35 | 60 | 35 | 11 |
| 1204 | Asahikawa C. | 266997 | 180 | 185 | 237 | 131 | 65 |
| 1205 | Muroran C. | 55050 | 29 | 21 | 42 | 17 | 14 |
| 1206 | Kushiro C. | 124945 | 93 | 75 | 88 | 62 | 32 |
| 1207 | Obihiro C. | 155438 | 57 | 78 | 112 | 76 | 45 |
| 1208 | Kitami C. | 89921 | 60 | 58 | 80 | 43 | 21 |
| 1209 | Yubari C. | 2882 | 2 | 1 | 2 | 1 | 0 |
| 1210 | Iwamizawa C. | 53640 | 37 | 26 | 46 | 27 | 10 |
| 1211 | Abashiri C. | 27896 | 9 | 11 | 21 | 14 | 8 |
| 1212 | Rumoi C. | 11627 | 8 | 8 | 10 | 6 | 4 |
| 1213 | Tomakomai C. | 148083 | 57 | 73 | 112 | 74 | 49 |
| 1214 | Wakkanai C. | 20803 | 14 | 13 | 15 | 10 | 7 |
| 1215 | Bibai C. | 10912 | 7 | 6 | 9 | 5 | 2 |
| 1216 | Ashibetsu C. | 6559 | 5 | 3 | 4 | 3 | 1 |
| 1217 | Ebetsu C. | 92706 | 62 | 67 | 63 | 46 | 22 |
| 1218 | Akabira C. | 4690 | 3 | 3 | 4 | 2 | 1 |
| 1219 | Mombetsu C. | 13743 | 10 | 9 | 9 | 7 | 4 |
| 1220 | Shibetsu C. | 11392 | 8 | 8 | 7 | 5 | 2 |
| 1221 | Nayoro C. | 19902 | 10 | 14 | 25 | 11 | 10 |
| 1222 | Mikasa C. | 3851 | 3 | 2 | 2 | 2 | 1 |
| 1223 | Nemuro C. | 15190 | 7 | 7 | 14 | 6 | 6 |
| 1224 | Chitose C. | 92345 | 27 | 44 | 74 | 35 | 27 |
| 1225 | Takikawa C. | 28131 | 20 | 14 | 23 | 14 | 5 |
| 1226 | Sunagawa C. | 10310 | 7 | 5 | 9 | 5 | 2 |
| 1227 | Utashinai C. | 1079 | 1 | 1 | 1 | 1 | 0 |
| 1228 | Fukagawa C. | 13097 | 9 | 9 | 8 | 6 | 3 |
| 1229 | Furano C. | 15619 | 11 | 11 | 12 | 8 | 4 |
| 1230 | Noboribetsu C. | 34485 | 24 | 18 | 29 | 17 | 6 |
| 1231 | Eniwa C. | 63003 | 29 | 38 | 42 | 30 | 16 |
| 1233 | Date C. | 25879 | 19 | 12 | 19 | 8 | 4 |
| 1234 | Kitahiroshima C. | 46222 | 32 | 22 | 38 | 23 | 8 |
| 1235 | Ishikari C. | 41384 | 28 | 20 | 36 | 20 | 7 |
| 1236 | Hokuto C. | 32362 | 22 | 16 | 28 | 16 | 5 |
| 1303 | Tobetsu-cho | 10007 | 8 | 7 | 9 | 3 | 2 |
| 1304 | Shinshinotsu-mura | 2076 | 1 | 1 | 1 | 1 | 0 |
| 1331 | Matsumae-cho | 2559 | 2 | 1 | 2 | 1 | 0 |
| 1332 | Fukushima-cho | 1682 | 1 | 1 | 1 | 1 | 0 |
| 1333 | Shiriuchi-cho | 2577 | 2 | 2 | 2 | 1 | 1 |
| 1334 | Kikonai-cho | 1776 | 1 | 1 | 1 | 1 | 0 |
| 1337 | Nanae-cho | 21466 | 15 | 10 | 17 | 11 | 5 |
| 1343 | Shikabe-cho | 2623 | 2 | 2 | 2 | 1 | 1 |
| 1345 | Mori-machi | 7970 | 5 | 6 | 8 | 4 | 3 |
| 1346 | Yakumo-cho | 9535 | 6 | 7 | 8 | 5 | 4 |
| 1347 | Oshamambe-cho | 3139 | 1 | 2 | 3 | 2 | 1 |
| 1361 | Esashi-cho | 4360 | 3 | 3 | 3 | 2 | 1 |
| 1362 | Kaminokuni-cho | 2086 | 1 | 1 | 2 | 1 | 0 |
| 1363 | Assabu-cho | 2128 | 1 | 1 | 2 | 1 | 1 |
| 1364 | Otobe-cho | 1749 | 1 | 1 | 2 | 1 | 0 |
| 1367 | Okushiri-cho | 1154 | 1 | 1 | 1 | 1 | 0 |
| 1370 | Imakane-cho | 3385 | 1 | 2 | 2 | 2 | 1 |
| 1371 | Setana-cho | 4006 | 3 | 2 | 3 | 2 | 1 |
| 1391 | Shimamaki-mura | 719 | 0 | 1 | 0 | 0 | 0 |
| 1392 | Suttsu-cho | 1646 | 1 | 1 | 2 | 1 | 1 |
| 1393 | Kuromatsunai-cho | 1953 | 1 | 1 | 2 | 1 | 0 |
| 1394 | Rankoshi-cho | 2670 | 2 | 2 | 2 | 1 | 1 |
| 1395 | Niseko-cho | 4723 | 2 | 3 | 6 | 2 | 3 |
| 1396 | Makkari-mura | 1313 | 1 | 1 | 1 | 0 | 1 |
| 1397 | Rusutsu-mura | 1261 | 1 | 1 | 1 | 1 | 1 |
| 1398 | Kimobetsu-cho | 1288 | 1 | 1 | 2 | 1 | 1 |
| 1399 | Kyogoku-cho | 1744 | 1 | 1 | 1 | 1 | 0 |
| 1400 | Kutchan-cho | 10966 | 6 | 6 | 14 | 5 | 6 |
| 1401 | Kyowa-cho | 3950 | 2 | 2 | 2 | 2 | 1 |
| 1402 | Iwanai-cho | 6790 | 4 | 5 | 8 | 3 | 3 |
| 1403 | Tomari-mura | 1194 | 0 | 1 | 1 | 1 | 1 |
| 1404 | Kamoenai-mura | 474 | 0 | 0 | 0 | 0 | 0 |
| 1405 | Shakotan-cho | 836 | 1 | 0 | 1 | 0 | 0 |
| 1406 | Furubira-cho | 1398 | 1 | 1 | 1 | 1 | 0 |
| 1407 | Niki-cho | 2350 | 1 | 2 | 2 | 1 | 1 |
| 1408 | Yoichi-cho | 11295 | 8 | 5 | 8 | 5 | 2 |
| 1409 | Akaigawa-mura | 591 | 0 | 0 | 1 | 0 | 0 |
| 1423 | Nanporo-cho | 4559 | 2 | 3 | 4 | 1 | 1 |
| 1424 | Naie-cho | 3275 | 2 | 2 | 1 | 1 | 0 |
| 1425 | Kamisunagawa-cho | 1374 | 1 | 1 | 1 | 1 | 0 |
| 1427 | Yuni-cho | 2843 | 2 | 1 | 2 | 1 | 1 |
| 1428 | Naganuma-cho | 7419 | 5 | 3 | 6 | 4 | 3 |
| 1429 | Kuriyama-cho | 7587 | 5 | 4 | 7 | 4 | 1 |
| 1430 | Tsukigata-cho | 2958 | 1 | 2 | 2 | 1 | 1 |
| 1431 | Urausu-cho | 1097 | 0 | 1 | 1 | 1 | 0 |
| 1432 | Shintotsukawa-cho | 4315 | 3 | 3 | 3 | 1 | 1 |
| 1433 | Moseushi-cho | 1393 | 1 | 1 | 1 | 1 | 0 |
| 1434 | Chippubetsu-cho | 1299 | 1 | 1 | 1 | 1 | 0 |
| 1436 | Uryu-cho | 1441 | 1 | 1 | 1 | 1 | 0 |
| 1437 | Hokuryu-cho | 1061 | 1 | 1 | 1 | 0 | 0 |
| 1438 | Numata-cho | 1468 | 1 | 1 | 1 | 1 | 0 |
| 1452 | Takasu-cho | 5288 | 4 | 3 | 3 | 2 | 1 |
| 1453 | Higashikagura-cho | 9804 | 6 | 7 | 9 | 5 | 3 |
| 1454 | Tohma-cho | 4247 | 3 | 3 | 3 | 2 | 1 |
| 1455 | Pippu-cho | 2116 | 1 | 1 | 2 | 1 | 0 |
| 1456 | Aibetsu-cho | 1477 | 1 | 1 | 1 | 1 | 0 |
| 1457 | Kamikawa-cho | 1787 | 1 | 1 | 2 | 1 | 1 |
| 1458 | Higashikawa-cho | 6911 | 4 | 4 | 4 | 2 | 2 |
| 1459 | Biei-cho | 6779 | 5 | 4 | 5 | 3 | 2 |
| 1460 | Kamifurano-cho | 6639 | 4 | 5 | 6 | 2 | 1 |
| 1461 | Nakafurano-cho | 3112 | 2 | 2 | 2 | 1 | 1 |
| 1462 | Minamifurano-cho | 1552 | 1 | 1 | 2 | 1 | 1 |
| 1463 | Shimukappu-mura | 514 | 0 | 0 | 1 | 0 | 0 |
| 1464 | Wassamu-cho | 1850 | 1 | 1 | 1 | 1 | 0 |
| 1465 | Kembuchi-cho | 1779 | 1 | 1 | 2 | 1 | 1 |
| 1468 | Shimokawa-cho | 1830 | 1 | 1 | 2 | 1 | 1 |
| 1469 | Bifuka-cho | 2450 | 2 | 1 | 2 | 1 | 1 |
| 1470 | Otoineppu-mura | 341 | 0 | 0 | 0 | 0 | 0 |
| 1471 | Nakagawa-cho | 870 | 0 | 1 | 1 | 0 | 0 |
| 1472 | Horokanai-cho | 695 | 0 | 0 | 1 | 0 | 0 |
| 1481 | Mashike-cho | 2153 | 2 | 1 | 2 | 1 | 1 |
| 1482 | Obira-cho | 1703 | 1 | 1 | 1 | 1 | 1 |
| 1483 | Tomamae-cho | 1462 | 1 | 1 | 1 | 1 | 0 |
| 1484 | Haboro-cho | 4166 | 2 | 3 | 3 | 2 | 1 |
| 1485 | Shosambetsu-mura | 563 | 0 | 0 | 0 | 0 | 0 |
| 1486 | Embetsu-cho | 1523 | 1 | 1 | 1 | 1 | 0 |
| 1487 | Teshio-cho | 1659 | 1 | 1 | 2 | 1 | 1 |
| 1511 | Sarufutsu-mura | 1872 | 1 | 1 | 2 | 2 | 1 |
| 1512 | Hamatombetsu-cho | 2122 | 1 | 2 | 3 | 2 | 1 |
| 1513 | Nakatombetsu-cho | 818 | 1 | 0 | 1 | 0 | 0 |
| 1514 | Esashi-cho | 4951 | 2 | 2 | 4 | 2 | 1 |
| 1516 | Toyotomi-cho | 2355 | 1 | 1 | 3 | 1 | 2 |
| 1517 | Rebun-cho | 1307 | 0 | 1 | 2 | 1 | 1 |
| 1518 | Rishiri-cho | 954 | 0 | 1 | 1 | 0 | 0 |
| 1519 | Rishirifuji-cho | 1321 | 0 | 1 | 1 | 1 | 0 |
| 1520 | Horonobe-cho | 1517 | 1 | 1 | 1 | 1 | 1 |
| 1543 | Bihoro-cho | 13274 | 9 | 10 | 13 | 5 | 6 |
| 1544 | Tsubetsu-cho | 2494 | 1 | 1 | 1 | 1 | 0 |
| 1545 | Shari-cho | 8191 | 3 | 6 | 12 | 4 | 5 |
| 1546 | Kiyosato-cho | 2460 | 1 | 1 | 2 | 1 | 1 |
| 1547 | Koshimizu-cho | 3452 | 1 | 2 | 2 | 2 | 1 |
| 1549 | Kunneppu-cho | 3127 | 1 | 2 | 2 | 1 | 1 |
| 1550 | Oketo-cho | 1605 | 1 | 1 | 2 | 1 | 1 |
| 1552 | Saroma-cho | 2863 | 2 | 1 | 2 | 1 | 1 |
| 1555 | Engaru-cho | 13497 | 8 | 10 | 10 | 7 | 4 |
| 1559 | Yubetsu-cho | 5466 | 4 | 4 | 5 | 3 | 2 |
| 1560 | Takinoue-cho | 1335 | 1 | 1 | 1 | 1 | 1 |
| 1561 | Okoppe-cho | 2258 | 1 | 2 | 3 | 1 | 1 |
| 1562 | Nishiokoppe-mura | 782 | 0 | 1 | 1 | 1 | 1 |
| 1563 | Omu-cho | 2437 | 1 | 2 | 3 | 1 | 1 |
| 1564 | Ozora-cho | 4667 | 3 | 2 | 2 | 1 | 1 |
| 1571 | Toyoura-cho | 2863 | 1 | 2 | 3 | 1 | 1 |
| 1575 | Sobetsu-cho | 1815 | 1 | 1 | 1 | 1 | 0 |
| 1578 | Shiraoi-cho | 9180 | 6 | 5 | 8 | 5 | 1 |
| 1581 | Atsuma-cho | 3428 | 1 | 1 | 3 | 2 | 1 |
| 1584 | Toyako-cho | 4928 | 4 | 3 | 3 | 2 | 1 |
| 1585 | Abira-cho | 5035 | 3 | 3 | 4 | 3 | 2 |
| 1586 | Mukawa-cho | 4180 | 2 | 2 | 3 | 2 | 1 |
| 1601 | Hidaka-cho | 7072 | 5 | 5 | 6 | 4 | 3 |
| 1602 | Biratori-cho | 3173 | 2 | 2 | 2 | 2 | 1 |
| 1604 | Niikappu-cho | 4049 | 2 | 2 | 4 | 2 | 2 |
| 1607 | Urakawa-cho | 6912 | 5 | 5 | 6 | 3 | 2 |
| 1608 | Samani-cho | 2196 | 1 | 1 | 2 | 1 | 1 |
| 1609 | Erimo-cho | 2748 | 2 | 2 | 3 | 1 | 1 |
| 1610 | Shinhidaka-cho | 12950 | 8 | 9 | 12 | 6 | 6 |
| 1631 | Otofuke-cho | 39517 | 23 | 25 | 25 | 19 | 8 |
| 1632 | Shihoro-cho | 4659 | 2 | 3 | 5 | 2 | 2 |
| 1633 | Kamishihoro-cho | 3147 | 1 | 2 | 5 | 2 | 2 |
| 1634 | Shikaoi-cho | 4478 | 2 | 3 | 5 | 2 | 2 |
| 1635 | Shintoku-cho | 4046 | 1 | 3 | 3 | 2 | 1 |
| 1636 | Shimizu-cho | 7235 | 3 | 5 | 7 | 3 | 3 |
| 1637 | Memuro-cho | 14637 | 11 | 7 | 10 | 6 | 3 |
| 1638 | Nakasatsunai-mura | 3236 | 2 | 2 | 2 | 2 | 1 |
| 1639 | Sarabetsu-mura | 2568 | 1 | 1 | 2 | 1 | 1 |
| 1641 | Taiki-cho | 4258 | 2 | 3 | 4 | 2 | 2 |
| 1642 | Hiroo-cho | 3939 | 2 | 3 | 2 | 1 | 1 |
| 1643 | Makubetsu-cho | 23805 | 11 | 12 | 16 | 12 | 5 |
| 1644 | Ikeda-cho | 3742 | 3 | 2 | 2 | 1 | 0 |
| 1645 | Toyokoro-cho | 1839 | 1 | 1 | 2 | 1 | 1 |
| 1646 | Hombetsu-cho | 3724 | 3 | 3 | 2 | 1 | 1 |
| 1647 | Ashoro-cho | 4073 | 2 | 2 | 5 | 2 | 2 |
| 1648 | Rikubetsu-cho | 1439 | 1 | 1 | 2 | 1 | 1 |
| 1649 | Urahoro-cho | 2518 | 1 | 1 | 2 | 1 | 1 |
| 1661 | Kushiro-cho | 13605 | 8 | 10 | 8 | 7 | 4 |
| 1662 | Akkeshi-cho | 5770 | 3 | 4 | 6 | 3 | 2 |
| 1663 | Hamanaka-cho | 3765 | 1 | 3 | 6 | 2 | 2 |
| 1664 | Shibecha-cho | 4924 | 2 | 2 | 4 | 2 | 2 |
| 1665 | Teshikaga-cho | 4602 | 3 | 2 | 4 | 2 | 1 |
| 1667 | Tsurui-mura | 1825 | 1 | 1 | 2 | 1 | 1 |
| 1668 | Shiranuka-cho | 3297 | 2 | 2 | 3 | 2 | 1 |
| 1691 | Betsukai-cho | 11150 | 5 | 8 | 16 | 8 | 5 |
| 1692 | Nakashibetsu-cho | 19739 | 12 | 14 | 21 | 10 | 8 |
| 1693 | Shibetsu-cho | 3214 | 2 | 2 | 2 | 2 | 1 |
| 1694 | Rausu-cho | 2861 | 1 | 2 | 3 | 1 | 1 |

Appendix Table 1-6. Estimated number of short-stay service recipients

in administration units of Hokkaido in 2045

| J-Code | Administration District | Total Population | Level １ | Level ２ | Level ３ | Level ４ | Level ５ |
| --- | --- | --- | --- | --- | --- | --- | --- |
| 1101 | Sapporo C., Chuo-ku | 261704 | 179 | 190 | 208 | 113 | 91 |
| 1102 | Sapporo C., Kita-ku | 270974 | 155 | 196 | 205 | 118 | 72 |
| 1103 | Sapporo C., Higashi-ku | 248709 | 157 | 178 | 174 | 102 | 70 |
| 1104 | Sapporo C., Shiroishi-ku | 201308 | 126 | 143 | 135 | 89 | 57 |
| 1105 | Sapporo C., Toyohira-ku | 214933 | 145 | 155 | 173 | 87 | 65 |
| 1106 | Sapporo C., Minami-ku | 98161 | 43 | 66 | 77 | 37 | 21 |
| 1107 | Sapporo C., Nishi-ku | 197708 | 114 | 143 | 151 | 95 | 56 |
| 1108 | Sapporo C., Atsubetsu-ku | 98283 | 66 | 71 | 64 | 47 | 23 |
| 1109 | Sapporo C., Teine-ku | 122601 | 70 | 89 | 104 | 49 | 28 |
| 1110 | Sapporo C., Kiyota-ku | 90739 | 60 | 66 | 80 | 35 | 18 |
| 1202 | Hakodate C. | 162712 | 111 | 115 | 135 | 81 | 40 |
| 1203 | Otaru C. | 60424 | 46 | 39 | 38 | 26 | 11 |
| 1204 | Asahikawa C. | 248360 | 179 | 178 | 171 | 98 | 48 |
| 1205 | Muroran C. | 49377 | 30 | 36 | 34 | 20 | 15 |
| 1206 | Kushiro C. | 114040 | 75 | 75 | 82 | 57 | 28 |
| 1207 | Obihiro C. | 149749 | 92 | 108 | 123 | 61 | 46 |
| 1208 | Kitami C. | 82362 | 57 | 59 | 55 | 37 | 18 |
| 1209 | Yubari C. | 2253 | 2 | 1 | 2 | 1 | 0 |
| 1210 | Iwamizawa C. | 47586 | 34 | 34 | 32 | 20 | 10 |
| 1211 | Abashiri C. | 25496 | 11 | 18 | 20 | 10 | 8 |
| 1212 | Rumoi C. | 9861 | 7 | 6 | 6 | 4 | 2 |
| 1213 | Tomakomai C. | 140442 | 87 | 102 | 102 | 68 | 36 |
| 1214 | Wakkanai C. | 18083 | 12 | 13 | 15 | 8 | 6 |
| 1215 | Bibai C. | 9092 | 7 | 5 | 6 | 4 | 2 |
| 1216 | Ashibetsu C. | 5420 | 4 | 3 | 3 | 2 | 1 |
| 1217 | Ebetsu C. | 85067 | 46 | 62 | 69 | 37 | 22 |
| 1218 | Akabira C. | 3819 | 3 | 2 | 2 | 1 | 1 |
| 1219 | Mombetsu C. | 12032 | 9 | 8 | 10 | 6 | 4 |
| 1220 | Shibetsu C. | 9895 | 5 | 7 | 8 | 4 | 3 |
| 1221 | Nayoro C. | 18044 | 12 | 11 | 13 | 9 | 4 |
| 1222 | Mikasa C. | 3213 | 2 | 2 | 3 | 2 | 1 |
| 1223 | Nemuro C. | 13210 | 8 | 10 | 17 | 7 | 7 |
| 1224 | Chitose C. | 89658 | 53 | 65 | 86 | 43 | 31 |
| 1225 | Takikawa C. | 25318 | 17 | 18 | 17 | 13 | 6 |
| 1226 | Sunagawa C. | 8978 | 6 | 6 | 6 | 4 | 2 |
| 1227 | Utashinai C. | 813 | 1 | 0 | 0 | 0 | 0 |
| 1228 | Fukagawa C. | 11499 | 8 | 8 | 10 | 4 | 2 |
| 1229 | Furano C. | 14082 | 9 | 10 | 12 | 6 | 4 |
| 1230 | Noboribetsu C. | 31170 | 21 | 19 | 23 | 15 | 6 |
| 1231 | Eniwa C. | 60339 | 34 | 44 | 48 | 24 | 17 |
| 1233 | Date C. | 23819 | 17 | 17 | 21 | 9 | 5 |
| 1234 | Kitahiroshima C. | 42907 | 30 | 31 | 29 | 19 | 9 |
| 1235 | Ishikari C. | 37642 | 29 | 17 | 18 | 12 | 5 |
| 1236 | Hokuto C. | 29253 | 22 | 21 | 19 | 12 | 5 |
| 1303 | Tobetsu-cho | 8675 | 4 | 6 | 7 | 4 | 3 |
| 1304 | Shinshinotsu-mura | 1843 | 1 | 1 | 2 | 1 | 1 |
| 1331 | Matsumae-cho | 1993 | 2 | 1 | 1 | 1 | 0 |
| 1332 | Fukushima-cho | 1324 | 1 | 1 | 1 | 1 | 1 |
| 1333 | Shiriuchi-cho | 2213 | 2 | 2 | 1 | 1 | 1 |
| 1334 | Kikonai-cho | 1408 | 1 | 1 | 1 | 0 | 0 |
| 1337 | Nanae-cho | 19691 | 13 | 14 | 13 | 9 | 4 |
| 1343 | Shikabe-cho | 2336 | 2 | 2 | 3 | 1 | 1 |
| 1345 | Mori-machi | 6730 | 4 | 5 | 6 | 3 | 2 |
| 1346 | Yakumo-cho | 8199 | 6 | 5 | 5 | 4 | 2 |
| 1347 | Oshamambe-cho | 2750 | 2 | 2 | 2 | 1 | 1 |
| 1361 | Esashi-cho | 3715 | 3 | 3 | 3 | 1 | 1 |
| 1362 | Kaminokuni-cho | 1686 | 1 | 1 | 1 | 0 | 0 |
| 1363 | Assabu-cho | 1815 | 1 | 1 | 1 | 1 | 0 |
| 1364 | Otobe-cho | 1445 | 1 | 1 | 1 | 0 | 0 |
| 1367 | Okushiri-cho | 934 | 1 | 0 | 1 | 0 | 0 |
| 1370 | Imakane-cho | 2988 | 2 | 2 | 3 | 1 | 1 |
| 1371 | Setana-cho | 3327 | 2 | 1 | 1 | 1 | 0 |
| 1391 | Shimamaki-mura | 606 | 0 | 0 | 1 | 0 | 0 |
| 1392 | Suttsu-cho | 1431 | 1 | 1 | 1 | 0 | 0 |
| 1393 | Kuromatsunai-cho | 1763 | 1 | 1 | 2 | 1 | 0 |
| 1394 | Rankoshi-cho | 2301 | 2 | 1 | 2 | 1 | 0 |
| 1395 | Niseko-cho | 4594 | 3 | 3 | 4 | 2 | 2 |
| 1396 | Makkari-mura | 1170 | 1 | 1 | 1 | 1 | 0 |
| 1397 | Rusutsu-mura | 1134 | 0 | 0 | 1 | 0 | 0 |
| 1398 | Kimobetsu-cho | 1129 | 1 | 1 | 1 | 1 | 0 |
| 1399 | Kyogoku-cho | 1516 | 1 | 1 | 1 | 0 | 0 |
| 1400 | Kutchan-cho | 10141 | 6 | 7 | 6 | 4 | 2 |
| 1401 | Kyowa-cho | 3559 | 3 | 3 | 3 | 2 | 2 |
| 1402 | Iwanai-cho | 5834 | 2 | 3 | 7 | 3 | 3 |
| 1403 | Tomari-mura | 1097 | 0 | 1 | 1 | 0 | 0 |
| 1404 | Kamoenai-mura | 391 | 0 | 0 | 0 | 0 | 0 |
| 1405 | Shakotan-cho | 682 | 0 | 0 | 1 | 0 | 0 |
| 1406 | Furubira-cho | 1155 | 1 | 1 | 1 | 0 | 0 |
| 1407 | Niki-cho | 2149 | 1 | 2 | 3 | 1 | 1 |
| 1408 | Yoichi-cho | 9847 | 7 | 6 | 7 | 5 | 2 |
| 1409 | Akaigawa-mura | 514 | 0 | 0 | 0 | 0 | 0 |
| 1423 | Nanporo-cho | 3893 | 2 | 3 | 4 | 2 | 2 |
| 1424 | Naie-cho | 2862 | 2 | 2 | 3 | 1 | 1 |
| 1425 | Kamisunagawa-cho | 1116 | 1 | 1 | 1 | 0 | 0 |
| 1427 | Yuni-cho | 2443 | 2 | 1 | 2 | 1 | 1 |
| 1428 | Naganuma-cho | 6639 | 3 | 5 | 5 | 3 | 2 |
| 1429 | Kuriyama-cho | 6687 | 5 | 5 | 5 | 3 | 1 |
| 1430 | Tsukigata-cho | 2623 | 1 | 2 | 3 | 1 | 1 |
| 1431 | Urausu-cho | 951 | 1 | 0 | 0 | 0 | 0 |
| 1432 | Shintotsukawa-cho | 3822 | 2 | 3 | 3 | 1 | 1 |
| 1433 | Moseushi-cho | 1134 | 1 | 1 | 0 | 0 | 0 |
| 1434 | Chippubetsu-cho | 1112 | 1 | 1 | 1 | 1 | 1 |
| 1436 | Uryu-cho | 1226 | 1 | 1 | 1 | 0 | 0 |
| 1437 | Hokuryu-cho | 915 | 1 | 0 | 1 | 0 | 0 |
| 1438 | Numata-cho | 1211 | 1 | 0 | 1 | 1 | 0 |
| 1452 | Takasu-cho | 4906 | 4 | 4 | 3 | 2 | 1 |
| 1453 | Higashikagura-cho | 9379 | 5 | 7 | 8 | 4 | 2 |
| 1454 | Tohma-cho | 3774 | 2 | 2 | 3 | 1 | 0 |
| 1455 | Pippu-cho | 1835 | 1 | 1 | 2 | 1 | 0 |
| 1456 | Aibetsu-cho | 1256 | 1 | 1 | 1 | 1 | 0 |
| 1457 | Kamikawa-cho | 1485 | 1 | 1 | 1 | 1 | 1 |
| 1458 | Higashikawa-cho | 6537 | 4 | 5 | 6 | 3 | 2 |
| 1459 | Biei-cho | 6146 | 3 | 3 | 5 | 2 | 1 |
| 1460 | Kamifurano-cho | 5848 | 4 | 3 | 2 | 2 | 1 |
| 1461 | Nakafurano-cho | 2749 | 2 | 2 | 2 | 1 | 1 |
| 1462 | Minamifurano-cho | 1380 | 1 | 1 | 2 | 1 | 1 |
| 1463 | Shimukappu-mura | 423 | 0 | 0 | 0 | 0 | 0 |
| 1464 | Wassamu-cho | 1583 | 1 | 1 | 1 | 1 | 0 |
| 1465 | Kembuchi-cho | 1524 | 1 | 1 | 1 | 1 | 0 |
| 1468 | Shimokawa-cho | 1562 | 1 | 1 | 1 | 1 | 1 |
| 1469 | Bifuka-cho | 2095 | 1 | 1 | 2 | 1 | 1 |
| 1470 | Otoineppu-mura | 282 | 0 | 0 | 0 | 0 | 0 |
| 1471 | Nakagawa-cho | 736 | 0 | 1 | 1 | 0 | 0 |
| 1472 | Horokanai-cho | 582 | 0 | 0 | 0 | 0 | 0 |
| 1481 | Mashike-cho | 1805 | 1 | 1 | 2 | 1 | 0 |
| 1482 | Obira-cho | 1457 | 1 | 1 | 1 | 0 | 0 |
| 1483 | Tomamae-cho | 1216 | 1 | 1 | 1 | 1 | 0 |
| 1484 | Haboro-cho | 3646 | 2 | 3 | 3 | 2 | 1 |
| 1485 | Shosambetsu-mura | 474 | 0 | 0 | 1 | 0 | 0 |
| 1486 | Embetsu-cho | 1316 | 1 | 1 | 1 | 0 | 0 |
| 1487 | Teshio-cho | 1398 | 1 | 1 | 1 | 1 | 0 |
| 1511 | Sarufutsu-mura | 1713 | 1 | 1 | 3 | 1 | 1 |
| 1512 | Hamatombetsu-cho | 1813 | 1 | 1 | 1 | 1 | 0 |
| 1513 | Nakatombetsu-cho | 679 | 0 | 0 | 1 | 0 | 0 |
| 1514 | Esashi-cho | 4365 | 2 | 2 | 2 | 1 | 1 |
| 1516 | Toyotomi-cho | 2051 | 1 | 1 | 1 | 1 | 0 |
| 1517 | Rebun-cho | 1096 | 1 | 1 | 1 | 1 | 0 |
| 1518 | Rishiri-cho | 789 | 0 | 1 | 1 | 0 | 0 |
| 1519 | Rishirifuji-cho | 1114 | 1 | 1 | 1 | 0 | 0 |
| 1520 | Horonobe-cho | 1352 | 0 | 1 | 2 | 1 | 1 |
| 1543 | Bihoro-cho | 11858 | 7 | 9 | 10 | 6 | 4 |
| 1544 | Tsubetsu-cho | 2104 | 2 | 1 | 1 | 1 | 1 |
| 1545 | Shari-cho | 7396 | 5 | 5 | 10 | 4 | 4 |
| 1546 | Kiyosato-cho | 2163 | 2 | 2 | 2 | 1 | 0 |
| 1547 | Koshimizu-cho | 3140 | 2 | 2 | 2 | 1 | 1 |
| 1549 | Kunneppu-cho | 2759 | 1 | 2 | 2 | 1 | 1 |
| 1550 | Oketo-cho | 1364 | 1 | 1 | 1 | 0 | 0 |
| 1552 | Saroma-cho | 2448 | 2 | 2 | 2 | 1 | 1 |
| 1555 | Engaru-cho | 12137 | 6 | 9 | 10 | 5 | 3 |
| 1559 | Yubetsu-cho | 4800 | 3 | 2 | 3 | 2 | 1 |
| 1560 | Takinoue-cho | 1126 | 1 | 1 | 2 | 1 | 1 |
| 1561 | Okoppe-cho | 1991 | 1 | 1 | 2 | 1 | 1 |
| 1562 | Nishiokoppe-mura | 723 | 0 | 0 | 1 | 1 | 0 |
| 1563 | Omu-cho | 2095 | 1 | 2 | 2 | 1 | 1 |
| 1564 | Ozora-cho | 4154 | 2 | 3 | 3 | 1 | 1 |
| 1571 | Toyoura-cho | 2612 | 2 | 2 | 2 | 1 | 1 |
| 1575 | Sobetsu-cho | 1619 | 1 | 1 | 2 | 1 | 0 |
| 1578 | Shiraoi-cho | 7770 | 6 | 5 | 5 | 3 | 1 |
| 1581 | Atsuma-cho | 3110 | 2 | 1 | 2 | 1 | 1 |
| 1584 | Toyako-cho | 4213 | 3 | 2 | 4 | 1 | 1 |
| 1585 | Abira-cho | 4491 | 3 | 3 | 4 | 2 | 1 |
| 1586 | Mukawa-cho | 3495 | 2 | 3 | 3 | 2 | 2 |
| 1601 | Hidaka-cho | 6165 | 4 | 3 | 5 | 3 | 1 |
| 1602 | Biratori-cho | 2816 | 2 | 1 | 2 | 1 | 1 |
| 1604 | Niikappu-cho | 3729 | 3 | 2 | 2 | 2 | 1 |
| 1607 | Urakawa-cho | 5879 | 4 | 3 | 4 | 3 | 1 |
| 1608 | Samani-cho | 1839 | 1 | 1 | 1 | 1 | 0 |
| 1609 | Erimo-cho | 2362 | 2 | 1 | 2 | 1 | 0 |
| 1610 | Shinhidaka-cho | 11197 | 8 | 7 | 7 | 4 | 2 |
| 1631 | Otofuke-cho | 37785 | 21 | 27 | 31 | 13 | 8 |
| 1632 | Shihoro-cho | 4362 | 2 | 3 | 4 | 2 | 2 |
| 1633 | Kamishihoro-cho | 2862 | 1 | 2 | 2 | 1 | 1 |
| 1634 | Shikaoi-cho | 4251 | 1 | 2 | 4 | 2 | 1 |
| 1635 | Shintoku-cho | 3667 | 2 | 3 | 3 | 1 | 1 |
| 1636 | Shimizu-cho | 6753 | 3 | 5 | 6 | 3 | 2 |
| 1637 | Memuro-cho | 13620 | 10 | 9 | 12 | 4 | 2 |
| 1638 | Nakasatsunai-mura | 3067 | 2 | 2 | 3 | 1 | 1 |
| 1639 | Sarabetsu-mura | 2425 | 1 | 2 | 2 | 1 | 1 |
| 1641 | Taiki-cho | 3977 | 1 | 2 | 3 | 2 | 1 |
| 1642 | Hiroo-cho | 3392 | 2 | 2 | 3 | 2 | 2 |
| 1643 | Makubetsu-cho | 22841 | 15 | 16 | 20 | 8 | 5 |
| 1644 | Ikeda-cho | 3195 | 2 | 2 | 3 | 1 | 1 |
| 1645 | Toyokoro-cho | 1622 | 1 | 1 | 2 | 1 | 1 |
| 1646 | Hombetsu-cho | 3130 | 2 | 2 | 3 | 1 | 1 |
| 1647 | Ashoro-cho | 3603 | 2 | 3 | 4 | 2 | 1 |
| 1648 | Rikubetsu-cho | 1275 | 1 | 1 | 2 | 1 | 1 |
| 1649 | Urahoro-cho | 2149 | 2 | 2 | 3 | 1 | 1 |
| 1661 | Kushiro-cho | 12121 | 8 | 9 | 11 | 6 | 4 |
| 1662 | Akkeshi-cho | 5049 | 3 | 4 | 6 | 2 | 2 |
| 1663 | Hamanaka-cho | 3349 | 2 | 2 | 4 | 2 | 1 |
| 1664 | Shibecha-cho | 4401 | 3 | 3 | 5 | 2 | 2 |
| 1665 | Teshikaga-cho | 4045 | 3 | 3 | 3 | 1 | 1 |
| 1667 | Tsurui-mura | 1651 | 1 | 1 | 1 | 1 | 0 |
| 1668 | Shiranuka-cho | 2657 | 2 | 1 | 2 | 1 | 1 |
| 1691 | Betsukai-cho | 10212 | 7 | 7 | 11 | 5 | 5 |
| 1692 | Nakashibetsu-cho | 18480 | 11 | 13 | 12 | 9 | 5 |
| 1693 | Shibetsu-cho | 2823 | 2 | 1 | 2 | 1 | 1 |
| 1694 | Rausu-cho | 2434 | 1 | 2 | 3 | 1 | 1 |
